1 **Coopting T cell proximal signaling molecules enables Boolean logic-gated CAR T cell control**

2

3 Aidan M. Tousley<sup>1</sup>, Maria Caterina Rotiroti<sup>1</sup>, Louai Labanieh<sup>2,3</sup>, Lea Wenting Rysavy<sup>1</sup>, Skyler P.  
4 Rietberg<sup>4</sup>, Eva L. de la Serna<sup>5</sup>, Guillermo Nicolas Dalton<sup>1</sup>, Dorota Klysz<sup>4</sup>, Evan W. Weber<sup>3,4</sup>,  
5 Won-Ju Kim<sup>1</sup>, Peng Xu<sup>4</sup>, Elena Sotillo<sup>4</sup>, Alexander R. Dunn<sup>5,7,8</sup>, Crystal L. Mackall<sup>1,3,4,9</sup>, and  
6 Robbie G. Majzner<sup>1,3,4\*</sup>

7

8

9 <sup>1</sup>Department of Pediatrics, Stanford University School of Medicine, Stanford, California

10 <sup>2</sup>Department of Bioengineering, Stanford University, Stanford, California

11 <sup>3</sup>Parker Institute for Cancer Immunotherapy, San Francisco, California

12 <sup>4</sup>Stanford Center for Cancer Cell Therapy, Stanford Cancer Institute, Stanford University School  
13 of Medicine, Stanford, California

14 <sup>5</sup>Department of Chemical Engineering, Stanford University, Stanford, California

15 <sup>6</sup>Parker Institute for Cancer Immunotherapy, San Francisco, California

16 <sup>7</sup>Stanford Cardiovascular Institute, Stanford School of Medicine, Stanford, California

17 <sup>8</sup>Biophysics Program, Stanford University, Stanford, California

18 <sup>9</sup>Department of Medicine, Stanford University School of Medicine, Stanford, California

19

20

21

22 \*To whom correspondence should be addressed: [rmajzner@stanford.edu](mailto:rmajzner@stanford.edu)

23

24 **Introductory paragraph:**

25

26 **While CAR T cells have altered the treatment landscape for B cell malignancies, the risk of**  
27 **on-target, off-tumor toxicity has hampered their development for solid tumors because most**  
28 **target antigens are shared with normal cells<sup>1,2</sup>. Researchers have attempted to apply Boolean**  
29 **logic gating to CAR T cells to prevent on-target, off-tumor toxicity<sup>3-7</sup>; however, a truly safe**  
30 **and effective logic-gated CAR has remained elusive<sup>8</sup>. Here, we describe a novel approach to**  
31 **CAR engineering in which we replace traditional ITAM-containing CD3 $\zeta$  domains with**  
32 **intracellular proximal T cell signaling molecules. We demonstrate that certain proximal**  
33 **signaling CARs, such as a ZAP-70 CAR, can activate T cells and eradicate tumors *in vivo***  
34 **while bypassing upstream signaling proteins such as CD3 $\zeta$ . The primary role of ZAP-70 is**  
35 **to phosphorylate LAT and SLP-76, which form a scaffold for the propagation of T cell**  
36 **signaling. We leveraged the cooperative role of LAT and SLP-76 to engineer Logic-gated**  
37 **Intracellular NetworK (LINK) CAR, a rapid and reversible Boolean-logic AND-gated CAR**  
38 **T cell platform that outperforms other systems in both efficacy and the prevention of on-**  
39 **target, off-tumor toxicity. LINK CAR will dramatically expand the number and types of**  
40 **molecules that can be targeted with CAR T cells, enabling the deployment of these powerful**  
41 **therapeutics for solid tumors and diverse diseases such as autoimmunity<sup>9</sup> and fibrosis<sup>10</sup>. In**  
42 **addition, this work demonstrates that the internal signaling machinery of cells can be**  
43 **repurposed into surface receptors, a finding that could have broad implications for new**  
44 **avenues of cellular engineering.**

45

46

## 47 **Main Text**

48 Chimeric antigen receptor (CAR) T cells have revolutionized the treatment of B cell  
49 malignancies, but are yet to make significant progress in treating solid tumors<sup>1,2</sup>. Lineage-derived  
50 B cell restricted antigens such as CD19 can be safely targeted with CAR T cells because depletion  
51 of B cells is not life threatening. This is not the case with solid tumors, where most overexpressed  
52 surface targets are also present on vital, normal tissues, creating the potential for on-target, off-  
53 tumor toxicity<sup>11</sup>. Thus, there is a dearth of antigens that can be safely targeted with CAR T cells  
54 for solid tumors<sup>12</sup>. As CARs are engineered to become even more potent and effective at  
55 recognizing low levels of antigen, the likelihood of on-target, off-tumor toxicity will further  
56 increase<sup>13,14</sup>. Thus, methods to apply Boolean logic to CAR T cells, endowing them with the ability  
57 to discriminate between normal and cancerous tissues, are essential to successfully target a large  
58 number of solid tumors.

59 Despite an intense focus on engineering more effective receptors<sup>15-18</sup>, CARs that are  
60 utilized today are very similar to the first iterations generated thirty years ago<sup>19</sup>. Almost all CARs  
61 contain a CD3 $\zeta$  endodomain, the master switch (so-called ‘Signal 1’) for initiating the T cell  
62 signaling cascade<sup>20,21</sup>. Iterations and improvements have focused on the addition of ‘Signal 2’  
63 (costimulatory domains)<sup>22</sup> and ‘Signal 3’ (cytokine receptors)<sup>23</sup>, or on endowing cells with an  
64 ability to resist a suppressive tumor microenvironment<sup>24</sup> or T cell exhaustion<sup>25</sup>. Other than  
65 manipulating the number of immunoreceptor tyrosine-based activation motifs (ITAMs) contained  
66 in the CD3 $\zeta$  chain<sup>13,26-28</sup>, few attempts have been made to alter Signal 1 in CAR constructs.

67 The reliance on CD3 $\zeta$  (or other ITAM-containing molecules) in CAR constructs has  
68 hampered the ability to apply Boolean logic gating to CAR T cells because ligation of the CAR  
69 alone triggers T cell activation. One method employed to overcome this limitation has been  
70 splitting the CD3 $\zeta$  and costimulatory domains into CARs with different specificities so that  
71 maximal activity is only achieved when both targets are ligated (SPLIT CAR)<sup>3-5</sup>. However, CD3 $\zeta$ -  
72 only constructs are capable of killing cells and have mediated on-target, off-tumor toxicity in  
73 clinical trials<sup>29,30</sup>. A more recently engineered system, SynNotch, utilizes a transcriptional circuit  
74 in which recognition of a first antigen drives expression of a traditional CD3 $\zeta$  based CAR with  
75 specificity for a second target antigen<sup>6</sup>. While elegantly designed, this system does not escape the  
76 potential for on-target, off-tumor toxicity of bystander normal tissue once the CD3 $\zeta$  CAR is  
77 expressed because the gene circuit is not immediately reversed<sup>8</sup>.

78 Here, we asked whether CARs utilize the same basic cellular signaling circuitry as the  
79 native T cell receptor (TCR). While we found that most proximal signaling molecules are  
80 necessary for CAR T cell activity, we also demonstrate that some molecules, such as ZAP-70 and  
81 PLC $\gamma$ 1, are sufficient themselves to initiate CAR T cell signaling, bypassing the need for CD3 $\zeta$ .  
82 Armed with this finding, we drew on an understanding of T cell signaling networks to engineer  
83 the first true Boolean logic AND-gated CAR T cell through the pairing of LAT and SLP-76. This  
84 is the first system capable of restricting CAR T cell activity to encounter of two antigens in a direct,  
85 instantaneous, and reversible manner.

## 86 **Results**

87 *CAR activity is dependent on the TCR machinery*

88 Although all clinically validated CAR constructs contain CD3 $\zeta$ , the master switch of  
90 activity for the T cell receptor (TCR)<sup>20</sup>, it is unknown whether CARs depend on the same proximal  
91 signaling networks as have been defined for the native TCR (Extended Data Figure 1a)<sup>31</sup>. We used  
92

93 CRISPR-Cas9 to individually knockout five proximal signaling molecules (Lck, Fyn, ZAP-70,  
94 LAT, and SLP-76) in primary human T cells expressing the CD19 CAR contained in  
95 tisagenlecleucel (Figure 1a, Extended Data Figure 1b) and measured degranulation (CD107a) and  
96 cytokine production (IL-2, TNF- $\alpha$ , and IFN $\gamma$ ) in response to antigen encounter (Figure 1b-e,  
97 Extended Data Figure 1c-e). While Fyn was expendable for CAR T cell function, in line with its  
98 overlapping role with Lck<sup>32</sup> and dispensability for T cell development<sup>33,34</sup>, knockout of Lck, ZAP-  
99 70, LAT, or SLP-76 resulted in a near total ablation of CAR activity (Figure 1b-e, Extended Data  
100 Figure 1c-e). Taken together, these data indicate that CARs largely rely on the same proximal  
101 signaling networks that have been previously described for the native TCR.

102

### 103 *Downstream signaling proteins mediate effector functions as CARs*

104 Having defined a set of proximal signaling molecules necessary for CAR T cell  
105 functionality, we next asked if any proximal signaling molecules themselves might be sufficient  
106 to induce T cell effector functions. We expressed six proximal signaling molecules (Lck, Fyn,  
107 ZAP-70, LAT, SLP-76, and PLC $\gamma$ 1) as CARs by tethering them to a transmembrane domain and  
108 a CD19 specific scFv (Figure 1f). Aside from LAT, these signaling molecules are natively located  
109 in the cytoplasm and do not contain a transmembrane domain, but expressed as transmembrane  
110 receptors when integrated into CARs (Figure 1f). Expression of a ZAP-70 kinase domain CAR  
111 required inclusion of interdomain B (IDB)<sup>35</sup>, a linker contained in the native molecule (ZAP-  
112 70<sup>KIDB</sup>, Extended Data Figure 1f-g). CARs bearing endodomains derived from ZAP-70 and PLC $\gamma$ 1  
113 generated robust IL-2 in response to antigen encounter, while those containing Lck, Fyn, LAT, or  
114 SLP-76 endodomains did not (Figure 1f). We observed similar findings with CARs recognizing  
115 HER2, although HER2-PLC $\gamma$ 1 CAR activity was limited due to poor expression (Extended Data  
116 Figure 1h-i). Thus, some proximal signaling molecules are sufficient to initiate and propagate T  
117 cell activity and can be redeployed in surface receptors.

118

### 119 *ZAP-70 CARs demonstrate robust in vivo activity*

120 To explore the utility of proximal signaling molecule CARs, we generated ZAP-70 CARs  
121 recognizing CD19, HER2, GD2, and B7-H3. Interestingly, we found significantly reduced  
122 expression of canonical T cell exhaustion markers on ZAP-70 CARs when utilizing scFvs that  
123 drive antigen independent tonic signaling such as GD2 and B7-H3 (Figure 2a-b, Extended Data  
124 Figure 2a)<sup>36,37</sup>. Consistent with this result, GD2-ZAP-70 T cells exhibited decreased antigen-  
125 independent IFN $\gamma$  production (Extended Data Figure 2b). Although *in vitro* tumor cell killing and  
126 IL-2 production did not meaningfully differ between ZAP-70- and CD3 $\zeta$ -based GD2 or B7-H3  
127 CARs (Extended Data Figure 2c-d), B7-H3-ZAP-70 CARs eradicated tumors in a xenograft model  
128 of metastatic neuroblastoma in which B7-H3-4-1BB $\zeta$  CARs were capable of only transient tumor  
129 control (Figure 2c-d). This enhanced anti-tumor activity was accompanied by substantially  
130 increased ZAP-70 CAR T cell expansion and persistence (Figure 2e, Extended Data Figure 2e).  
131 These data demonstrate that proximal signaling based CARs are capable of mediating robust anti-  
132 tumor activity *in vivo* and may be advantageous when utilized with scFvs demonstrating a high  
133 degree of tonic signaling.

134

### 135 *ZAP-70 CARs depend on intrinsic kinase activity, bypassing CD3 $\zeta$ and Lck*

136 We then asked whether the activity of the ZAP-70 CAR is dependent on CD3 $\zeta$  or other  
137 ITAMs found in the native TCR. CRISPR-Cas9 mediated knockout of the *TRAC* locus in ZAP-70  
138 CAR T cells did not reduce tumor cell killing or IL-2 production (Extended Data Figure 3a-b),

139 indicating that TCR ITAM domains are not required to initiate CAR T cell signaling. To  
140 understand the mechanism by which the ZAP-70 CAR propagates T cell signaling, we introduced  
141 a mutation that interrupts its kinase activity (D461N)<sup>38</sup> and found that this abrogated both tumor  
142 cell killing and IL-2 production (Figure 2f-g, Extended Data Figure 3c). Furthermore, knockout of  
143 the downstream targets of ZAP-70, LAT or SLP-76, also abrogated ZAP-70 CAR T cell activity,  
144 while knockout of upstream molecules Lck or Fyn did not (Figure 2h-i, Extended Data Figure 3d-  
145 h). Thus, ZAP-70 CARs rely on activity of their kinase domain on downstream molecules and,  
146 unlike CD3 $\zeta$  based CARs, can activate independently of TCR ITAMs and Src family kinase  
147 members.

148

#### 149 *Pairing LAT and SLP-76 CARs allows for Boolean-logic AND-gating*

150 Endogenous ZAP-70 is known to phosphorylate LAT and SLP-76, which then form a  
151 scaffold for PLC $\gamma$ 1 and other signaling molecules to propagate downstream effector functions<sup>39</sup>.  
152 Given that both ZAP-70 and PLC $\gamma$ 1 are sufficient to promote CAR-T cell activation, and that the  
153 ZAP-70 CAR is dependent on the presence of LAT and SLP-76, we hypothesized that we could  
154 similarly initiate T cell activity by clustering LAT and SLP-76 CARs to form a synthetic scaffold  
155 (Figure 3a). While T cells expressing either a CD19-LAT CAR or a HER2-SLP-76 CAR did not  
156 produce IL-2 in response to antigen encounter, T cells co-transduced with both CARs robustly  
157 responded to dual antigen encounter (Figure 3b). This stood in contrast to all other combinations  
158 of other inactive proximal signaling CARs (Lck, Fyn, SLP-76, and LAT), none of which responded  
159 to dual antigen encounter (Extended Data Figure 4a-b).

160 Given their ability to respond to dual antigen expressing cells, paired LAT and SLP-76  
161 CARs appeared to have the potential for Boolean logic AND-gating, in which CAR T cell activity  
162 is dependent on encounter of two distinct antigens, increasing their specificity in the clinic.  
163 However, while T cells co-transduced with both CD19-LAT and HER2-SLP-76 CARs responded  
164 to dual antigen encounter, they also demonstrated some degree of ‘leakiness,’ responding also to  
165 tumor cells expressing only one antigen (CD19 or HER2) (Figure 3c-d). Leakiness potentially  
166 increases the risk of CAR-mediated toxicity due to recognition of normal tissue expressing only  
167 one of the target antigens.

168 As both the LAT and SLP-76 component CARs contained a CD28 hinge/transmembrane  
169 (TM) domain, we hypothesized that these may homodimerize, bringing both CARs to the immune  
170 synapse even when only one antigen is engaged. Alternating the CAR TM domains between the  
171 constructs (CD28 and CD8, Figure 3e, Extended Data Figure 4c) reduced some of the single  
172 antigen activity, especially when T cells encountered HER2, the cognate antigen for the SLP-76  
173 CAR (Figure 3f). The most promising combination (CD19-28TM-LAT + HER2-8TM-SLP-76)  
174 did not kill tumor cells expressing only HER2, but maintained some leaky activity, killing tumor  
175 cells expressing only CD19 (Figure 3g). We termed this combination **L**ogic-gated **I**ntracellular  
176 **N**etwork **K** (LINK) CAR and undertook further engineering to enhance its specificity. To reduce  
177 potential hetero- and homo-dimerization, we mutated the cysteine residues in the CD28 TM on the  
178 LAT CAR (2CA, Extended Data Figure 4d-e), which resulted in additional reduction of single  
179 antigen leakiness, but did not prevent killing of tumor cells expressing only CD19 (Extended Data  
180 Figure 4f-g).

181

#### 182 *Targeted mutations establish AND-gate specificity*

183 Given the persistent leakiness in the LINK platform, we undertook mechanistic studies to  
184 help guide our engineering approach. Knockout of ZAP-70, Lck, or Fyn did not abrogate T cell

185 activity, demonstrating that LINK CARs bypass the upstream members of the proximal signaling  
186 cascade (Figure 3h-i, Extended Data Figure 5a-e). Furthermore, mutation of the tyrosine in LAT  
187 required for recruitment of PLC $\gamma$ 1 (Y132F)<sup>40,41</sup> abrogated LINK CAR T cell activity (Figure 3j-k,  
188 Extended Data Figure 5f), demonstrating that downstream recruitment of PLC $\gamma$ 1 is essential for  
189 its function.

190 In native T cells, LAT and SLP-76 do not interact directly, but instead through adapter  
191 molecules from the Grb2 family such as GADS<sup>41,42</sup>. We hypothesized that upon dual antigen  
192 encounter, the LAT and SLP-76 CARs come together through association with GADS (or other  
193 Grb2 family members) to form a scaffold for PLC $\gamma$ 1 (Figure 3l), and that this association may have  
194 also been occurring in the absence of dual antigen ligation, causing leakiness. Therefore, we  
195 deleted the GADS binding sites in both the LAT (del171-233)<sup>41</sup> and SLP-76 (del224-244)<sup>43</sup> CARs  
196 (Figure 4a). When combined with the CD28 H/TM 2CA mutation detailed above (Extended Data  
197 Figure 6a-b), these targeted deletions resulted in a true AND-gate system, in which cytokine  
198 production (Figure 4b) and tumor cell killing (Figure 4c), as well as T cell degranulation and  
199 activation (Figure 4d, Extended Data Figure 6c) were largely eliminated except in response to dual  
200 antigen encounter. Targeted mutations to the tyrosine residues in LAT that interrupt its interaction  
201 with GADS (Y171F/Y191F)<sup>41,44</sup> had a similar effect to the GADS truncations (Extended Data  
202 Figure 6d-e), further demonstrating the importance of the LAT/GADS interaction to effective  
203 engineering of the LINK CAR.

204

205 *LINK mediates tumor clearance and survival in a model on-target, off-tumor toxicity*

206 To test the *in vivo* efficacy and specificity of the LINK CAR, we utilized a model of on-  
207 target, off-tumor toxicity mediated by a ROR1 specific CAR that recognizes both human and  
208 murine ROR1 (Extended Data Figure 7a-c)<sup>8</sup> (Labanieh *et al.*, *in revision*). On-target, off tumor  
209 recognition of ROR1 expressed on mouse lung tissues by CAR T cells causes toxicity manifested  
210 by rapid weight loss and death (Extended Data Figure 7a) (Labanieh *et al.*, *in revision*).

211 Using isogenic cell lines (Extended Data Figure 7c), we confirmed the *in vitro* activity and  
212 dual antigen specificity of ROR1/CD19 LINK CARs (Extended Data Figure 7d-e), then proceeded  
213 to test multiple LINK CAR iterations *in vivo*. Mice bearing ROR1<sup>+</sup>, CD19<sup>+</sup> Nalm6 xenografts were  
214 inoculated with ROR1 targeted CAR T cells. As we observed greater leakiness from the LAT CAR  
215 components in the early LINK CAR iterations, we first tested LINK CARs with specificity for  
216 ROR1 on LAT and CD19 on SLP-76. Similar to the conventional ROR1-CD28 $\zeta$  CAR, the ROR1-  
217 CD28TM-LAT + CD19-CD8TM-SLP-76 CAR (LINK) mediated on-target toxicity, as evidenced  
218 by rapid weight loss and death. Mice that received ROR1-CD28TM<sup>2CA</sup>-LAT + CD19-CD8TM-  
219 SLP-76 CAR (LINK<sup>2CA</sup>) demonstrated longer survival, but toxicity eventually manifested after  
220 several weeks. However, LINK CARs in which the GADS interaction sites were deleted (either  
221 ROR1-CD28TM-LAT <sup>$\Delta$ GADS</sup> + CD19-CD8TM-SLP-76 <sup>$\Delta$ GADS</sup> [LINK <sup>$\Delta$ GADS</sup>] or ROR1-CD28TM<sup>2CA</sup>-  
222 LAT <sup>$\Delta$ GADS</sup> + CD19-CD8-SLP-76 <sup>$\Delta$ GADS</sup> [LINK<sup>2CA+ $\Delta$ GADS</sup>]) mediated complete tumor cell clearance  
223 without any evidence of on-target, off tumor toxicity (Figure 4e-g). We also reversed the  
224 orientations of these CARs (now with ROR1 specificity on SLP-76 and CD19 on LAT) and found  
225 that even in this orientation, prevention of toxicity required use of the optimized LINK<sup>2CA+ $\Delta$ GADS</sup>  
226 CAR (CD19-CD28TM<sup>2CA</sup>-LAT <sup>$\Delta$ GADS</sup> + ROR1-CD8TM-SLP-76 <sup>$\Delta$ GADS</sup>, Extended Data Figure 8a-  
227 e).

228 There have been several previous attempts in the literature to generate AND gate CARs.  
229 These include the ‘SPLIT’ CAR system, in which the CD3 $\zeta$  and costimulatory domains are split  
230 into CARs with different specificities<sup>3-5</sup>, as well as gene-circuits such as the SynNotch system<sup>6</sup>. In

231 the SynNotch system, response to encounter of a first antigen (antigen A), a synthetic Notch  
232 receptor releases a transcription factor that then drives expression of a traditional cytolytic CAR  
233 with specificity for a second antigen (antigen B). Thus, SynNotch cells are primed by antigen A  
234 to recognize and kills cells expressing antigen B. While elegantly designed to program  
235 transcriptional responses in T cells, this system is not a true AND-gate because cells that are  
236 primed by antigen A can then attack any tissue expressing antigen B (Extended Data Figure 9a).  
237 Previous work has demonstrated that SynNotch does not prevent on-target, off-tumor toxicity in  
238 mouse models<sup>8</sup>.

239 We compared our LINK CAR platform to both SynNotch (CD19-SynNotch → ROR1-  
240 CD28 $\zeta$ ) and SPLIT (ROR1-8TM- $\zeta$  + CD19-28TM-CD28) CARs (Extended Data Figure 9b) in the  
241 toxicity model described above. We confirmed that the SynNotch system was appropriately primed  
242 by encounter of CD19 to express the ROR1 CAR (Extended Data Figure 9c) and that its specificity  
243 was largely restricted to dual antigen encounter *in vitro* (Extended Data Figure 9d). However, the  
244 SynNotch CAR mediated significant on-target, off-tumor toxicity similar to that which was  
245 observed with a traditional ROR1-CD28 $\zeta$  CAR (albeit slightly delayed). The SPLIT CAR system  
246 mediated neither toxicity nor detectable tumor control, performing similarly to MOCK T cells,  
247 although it did demonstrate some *in vitro* activity (Extended Data Figure 9e). In contrast,  
248 LINK<sup>2CA+ $\Delta$ GADS</sup> CAR mediated complete tumor control without any signs of on-target, off-tumor  
249 toxicity (Figure 4h-j). Thus, the LINK CAR platform is capable of specific and effective anti-  
250 tumor activity while preventing fatal on-target, off-tumor toxicity.

251

## 252 Discussion

253 CAR T cells have become an essential tool in the treatment of B cell malignancies and are  
254 a curative, life-saving therapy for many patients<sup>2,45-53</sup>. However, the deployment of CAR T cells  
255 to treat solid tumors has been slow and marked by failures<sup>1,54</sup>. One major obstacle is the dearth of  
256 tumor specific targets not shared with vital, normal tissues<sup>11,12</sup>. While CARs can sometimes  
257 demonstrate a therapeutic window between tumors expressing very high levels of antigen and  
258 normal cells expressing the same target at lower levels<sup>13,37,55-58</sup>, as more potent CAR T cells are  
259 engineered, more frequent on-target, off tumor toxicity is likely to emerge in clinical studies.

260 We have generated the first true Boolean-logic AND-gated CAR T cells by coopting the  
261 cell's LAT/SLP-76 scaffold that is required for T cell signaling. By leveraging native T cell  
262 signaling biology, we were able to achieve a highly specific and portable system for restricting T  
263 cell responses to dual antigen encounter. Several other AND-gate CAR systems have been  
264 engineered, including SynNotch<sup>6</sup> and SPLIT CAR<sup>3-5</sup>, but as demonstrated by others<sup>8</sup> and in our  
265 data, these have shortcomings in both specificity and efficacy *in vivo*. Two additional AND-gate  
266 systems which require co-administration of foreign proteins to redirect CAR T cells based on  
267 antigen expression have been proposed and tested *in vitro* (LOCK-R<sup>59</sup> and SUPRA CAR<sup>60</sup>). Small  
268 protein therapeutics are technically challenging to administer in the clinic due to their  
269 pharmacokinetics and may have limited ability to effectively traffic into tissues. Furthermore,  
270 completely synthetic proteins are potentially highly immunogenic. In contrast, the signaling  
271 components of the LINK CAR are fully human and the system can be readily engineered to any  
272 specificity in a modular fashion. Identification of ideal AND-gate targets is a growing field in  
273 oncology<sup>61,62</sup>, and this system is poised to alter the landscape of what molecules can be safely  
274 targeted with CAR T cells. Additional work utilizing patient samples and single cell  
275 technologies<sup>62-64</sup> will be necessary to identify safe and effective targets for LINK CAR T cells.

276 We engineered LINK CARs after observing that intracellular, proximal signaling  
277 molecules such as ZAP-70 and PLC $\gamma$ 1 can function as signaling domains in synthetic  
278 transmembrane receptors. This work demonstrates that synthetic receptors can repurpose cytosolic  
279 kinases and other signaling machinery to control intracellular processes. This discovery may be  
280 broadly applicable across cell types and lead to the development of new cellular therapies apart  
281 from those using T cells.

282 Proximal signaling CARs, including ZAP-70 and LINK CARs, bypass the upstream  
283 components of the TCR machinery, but it remains undefined how these constructs are  
284 phosphorylated and whether the transcriptional programs they induce are similar to those induced  
285 by traditional CD3 $\zeta$  containing CARs. These newly designed CARs also bypass a highly evolved  
286 system for kinetic proofreading that reduces signal transduction in response to low affinity  
287 interactions and prevents autoimmunity driven by self-reactive TCRs<sup>65</sup>. ZAP-70 CARs  
288 demonstrate some advantages in our models including reduced tonic signaling and T cell  
289 exhaustion as well as increased expansion. It is possible that some ZAP-70 CARs outperform  
290 CD3 $\zeta$  CARs because their signal strength is better calibrated<sup>28</sup> or because, by bypassing CD3 $\zeta$  and  
291 Lck, ZAP-70 CARs may evade inhibitory ligands and other regulatory mechanisms in T cells<sup>66</sup>.  
292 Future work will define the basis for enhanced ZAP-70 CAR activity and assess whether the same  
293 advantages hold true for LINK and PLC $\gamma$ 1 CARs.

294 In summary, we have engineered a toolbox of novel CARs using proximal signaling  
295 molecules that demonstrate enhanced functionality and specificity, including a robust system for  
296 instantaneous and reversible Boolean logic AND-gating that outperforms previously published  
297 systems. By repurposing cytosolic molecules into CARs, we can control cellular activity in a  
298 highly functional but unanticipated manner. Our tools offer scientists and physicians newfound  
299 ability to control and enhance CAR T cell functionality in the clinic. These advances may have  
300 broad impact, not only in the field of cancer immunotherapy, but also as researchers extend CAR  
301 T cells to diseases such as autoimmunity and develop new classes of cellular therapies.

302



## 303 **Methods**

304

### 305 **Construction of CAR constructs**

306

307 CD19-4-1BB $\zeta$ , HER2-4-1BB $\zeta$ , B7-H3-4-1BB $\zeta$ , and GD2-4-1BB $\zeta$  CAR constructs were  
308 previously described<sup>13,36,37</sup>. CAR constructs were generated with a mix of restriction enzyme and  
309 In-Fusion HD Cloning (Takara Bio) using codon optimized gBlocks purchased from Integrated  
310 DNA Technologies. All CARs were cloned into MSGV1 vectors unless otherwise indicated. For  
311 Lck, Fyn, ZAP-70 and SLP-76 CARs, the full-length proteins were codon optimized and used. For  
312 LAT CARs, the intracellular sequence of LAT (residues 28-262) was similarly codon optimized  
313 and cloned. To generate CD19-ZAP-70<sup>Kinase</sup> and CD19-ZAP-70<sup>KIDB</sup> CARs, segments of ZAP-70  
314 comprised of the Interdomain B and kinase domain regions (residues 255-600) or the kinase  
315 domain only (residues 338-600) were utilized. Mutations and deletions in these CARs were  
316 introduced via In-Fusion cloning on PCR fragments.

317

318 The ROR1 scFv was derived from a humanized clone F antibody (US Patent 20200405759A1),  
319 generated as a gBlock and cloned into CAR backbones. A VSV-g tag was added to the ROR1 scFv  
320 at the N-terminus after the signal sequence via In-Fusion Cloning to improve detection of ROR1-  
321 targeting CARs by flow cytometry. SPLIT CARs were generated by separating CD3 $\zeta$  and CD28  
322 domains into separate CARs using PCR and In-Fusion cloning.

323

324 The CD19 SynNotch construct was generated by PCR-amplifying the CD19 scFv, Notch  
325 extracellular domain, Notch transmembrane domain, Gal4, and VP64 from Addgene plasmid  
326 #79125 and cloning the product into the MSGV1 vector.

327

328 The SynNotch-inducible ROR1-28 $\zeta$  construct was generated via insertion of a DNA sequence,  
329 from 5' to 3', encoding GAL4 UAS response elements from Addgene plasmid #79123, a minimal  
330 CMV promoter, GM-CSF leader sequence, VSVg tag, ROR1-CD28 $\zeta$  CAR, woodchuck hepatitis  
331 virus post-transcriptional regulatory element (WPRE), EF1 $\alpha$  promoter, and mTagBFP2 into a  
332 lentiviral backbone plasmid (System Biosciences # TR012PA).

333

334 All constructs were verified by DNA sequencing (Elim Biopharmaceuticals).

335

### 336 **Generation of cell lines**

337 The Nalm6-GFP Luciferase B-ALL cell line was obtained from S. Grupp (University of  
338 Pennsylvania, Philadelphia, PA), CHLA-255 from R. Seeger (Keck School of Medicine, USC),  
339 and 143B from ATCC. The generation of B7-H3<sup>+</sup>, HER2<sup>+</sup>, GD2<sup>+</sup>, ROR1<sup>+</sup> Nalm6 lines as well as  
340 CD19KO Nalm6 were previously described<sup>25,37,67</sup> (*Labanieh et al., in revision*). All tumor cell lines  
341 were cultured in complete RPMI media supplemented with 10% FBS, 10 mM HEPES, 2 mM  
342 GlutaMAX, 100 U/mL penicillin, and 100  $\mu$ g/mL streptomycin (Gibco).

343

344 To generate isogenic Nalm6-GL cell lines expressing CD19, HER2, and ROR1, Nalm6 cells were  
345 virally transduced with retroviral or lentiviral vectors encoding cDNA for the antigen of interest.  
346 Expression was verified via flow cytometry, and cells were FACS sorted on Stanford FACS Core  
347 Shared FACSaria cytometers (BD Biosciences). Cell lines were sorted to obtain matching target  
348 expression between lines.

### 349 **Production of retroviral and lentiviral supernatant**

350 Retroviral supernatant was generated via transient transfection of 293GP cells, as previously  
351 described<sup>36</sup>. In brief,  $6-7 \times 10^6$  293GP cells were added to 100 mm Poly-D-Lysine-coated plates  
352 in complete DMEM media supplemented with 10% FBS, 10 mM HEPES, 2 mM GlutaMAX, 100  
353 U/mL penicillin, and 100  $\mu\text{g}/\text{mL}$  streptomycin (Gibco). The following day, cells were co-  
354 transfected with 9  $\mu\text{g}$  vector plasmid and 4.5  $\mu\text{g}$  RD114 with Lipofectamine 2000 (Invitrogen) in  
355 Opti-MEM media (Gibco). The media was replaced after 24 hours and harvested at 48 and 72 hour  
356 time points. Viral supernatant was frozen at  $-80^\circ\text{C}$  for long term storage.

357  
358 Lentiviral supernatant was generated as previously described<sup>67</sup>. In brief,  $6-7 \times 10^6$  293T cells  
359 were added to 100 mm Poly-D-Lysine-coated plates in complete DMEM media supplemented  
360 with 10% FBS, 10 mM HEPES, 2 mM GlutaMAX, 100 U/mL penicillin, and 100  $\mu\text{g}/\text{mL}$   
361 streptomycin (Gibco). The following day, cells were co-transfected with 9  $\mu\text{g}$  vector plasmid, 9  
362  $\mu\text{g}$  pRSV-Rev, 9  $\mu\text{g}$  pMDLg/pRRe, and 3.5  $\mu\text{g}$  pMD2.G with Lipofectamine 2000 (Invitrogen)  
363 in Opti-MEM media (Gibco). The media was replaced after 24 hours and harvested at 48 and 72  
364 hour time points. Viral supernatant was frozen at  $-80^\circ\text{C}$  for long term storage.

### 365 **PBMC and T cell isolation**

367 Healthy donor buffy coats, leukopaks or Leukocyte Reduction System (LRS) chambers were  
368 obtained through the Stanford Blood Center under an IRB-exempt protocol. Peripheral blood  
369 mononuclear cells were isolated using Ficoll-Paque Plus (GE Healthcare, 17-1440) density  
370 gradient centrifugation according to the manufacturer's instructions and cryopreserved with  
371 CryoStor CS10 freeze media (Sigma-Aldrich) in  $1-5 \times 10^7$  cell aliquots. In some experiments, T  
372 cells were isolated using the RosetteSep Human T Cell Enrichment kit (Stem Cell Technologies)  
373 according to the manufacturer's protocol.

### 374 **CAR T cell transduction and culture**

376 CAR T cells were generated and cultured as previously described<sup>67</sup>. Briefly, cryopreserved  
377 PBMCs or T cells were thawed on day 0 and cultured with Human T-Activator  $\alpha\text{CD3}/\text{CD28}$   
378 Dynabeads (Gibco) at 3:1 bead:cell ratio in AIM-V media (Gibco) supplemented with 5% FBS,  
379 10 mM HEPES, 2 mM GlutaMAX, 100 U/mL penicillin, 100  $\mu\text{g}/\text{mL}$  streptomycin, and 100 U/mL  
380 recombinant human IL-2 (PeproTech).

381  
382 Retroviral/lentiviral transductions were performed on days 3 and 4 post activation on retronectin  
383 (Takara) coated non-tissue culture treated plates. Wells were coated with 1 mL of 25  $\mu\text{g}/\text{mL}$   
384 retronectin in PBS overnight, then blocked with 2% BSA in PBS for 15 minutes prior to  
385 transduction. 1 mL of thawed retroviral supernatant per CAR construct was added and plates were  
386 then centrifuged at 3,200 RPM at  $32^\circ\text{C}$  for 2-3 hours. Viral supernatant was discarded and  $0.5 \times$   
387  $10^6$  T cells were added to each well in 1 mL of complete AIM-V media.

388  
389 On day 5 post-activation, CD3/CD28 beads were removed with a magnet, and CAR T cells were  
390 maintained in culture with AIM-V media changes every 2-3 days at a density of  $0.3 \times 10^6$  cells/mL.

### 391 **Knockout of proximal signaling molecules**

393

394 Proximal signaling molecule expression was disrupted with CRISPR-Cas9 mediated gene  
395 disruption. sgRNA for TRAC was previously described<sup>13</sup>. All other sgRNAs were designed using  
396 the Knockout Design Tool (Synthego). The sgRNA target sequences (5' to 3') used were:

397 Lck- CTTCAAGAACCTGAGCCGCA

398 Fyn- TGGAGGTCACACCGAAGCTG, AGAAGCAACAAAACCTGACGG

399 ZAP-70- CAGTGCCTGCGCTCGCTGGG, CCTGAAGCTGGCGGGCATGG

400 LAT- CACACACAGTGCCATCAACA, CGTTTGAAGCTGGATGCCCT

401 SLP-76- AATAGTCAGCAAGGCTGTCG, GAAGAAGTACCACATCGATG

402 TRAC- GAGAATCAAATCGGTGAAT

403

404 Editing was performed on T cells after Dynabead removal five days after T cell activation. T cells  
405 were resuspended in P3 buffer (0.75-1 x 10<sup>6</sup> cells per 18 µl P3) from the P3 Primary Cell 4D-  
406 Nucleofector X Kit S (Lonza). 10 µg/µl Alt-R S.p. Cas9 Nuclease V3 and Nuclease-free Duplex  
407 Buffer (IDT) were mixed in a 1:2 ratio; the ensuing mixture was then incubated at a 1:1 ratio with  
408 120 pmol sgRNA for approximately 10 minutes. 18 µl of cells were mixed with 2 µl of  
409 sgRNA:Cas9 ribonucleoprotein complexes, then electroporated in 16-well cuvette strips under the  
410 E0-115 program. CAR T cells were quickly transferred into 200 µl of compete AIM-V media and  
411 allowed to incubate at 37°C for 24 hours before being moved to larger volumes and cultured as  
412 described above. For knockouts conducted using multiple sgRNAs, each sgRNA was incubated  
413 with Cas9/Duplex mix at a 1:1 ratio separately, then 2 µl of each mix was added to 18 µl of cells  
414 in P3 buffer (if two sgRNAs are used, the final volume was 22 µl). Knockout efficiency was  
415 assessed via intracellular flow cytometry upon expansion of the edited cells (as below).

416

#### 417 **Flow cytometry**

418 Cells were washed with FACS buffer (2% FBS in PBS) before staining. Staining was performed  
419 in FACS buffer for 20 minutes at 4°C. If a live/dead stain was used, 1X Fixable Viability Dye  
420 eFluor 780 (eBioscience) was also added to the staining mix. Cells were then washed once with  
421 FACS buffer on a BD Fortessa. FACSDiva software (BD) was used for Fortessa data collection.

422

423 T cells were assessed for CAR expression on the same day they were used for *in vitro/in vivo*  
424 assays. CD19-targeting CARs were detected using the anti-CD19 CAR idotype antibody provided  
425 by L. Cooper (MD Anderson Cancer Center)<sup>68</sup>. GD2-targeting CARs were detected using the 1A7  
426 anti-14G2a idotype antibody obtained from National Cancer Institute. HER2, B7-H3, and human  
427 and mouse ROR1-targeting CARs were detected using human HER2-Fc, B7-H3-Fc, and human  
428 or mouse ROR1-Fc recombinant proteins (R&D). Idotype antibodies and Fc-proteins were  
429 fluorophore-conjugated using DyLight 650 or DyLight 488 Microscale Antibody Labeling Kits  
430 (Invitrogen). ROR1 scFvs also contained a VSV-g tag that were detected by anti-VSV-g  
431 polyclonal antibody (FITC, Abcam).

432

433 The following antibodies were used for T cell staining:

434 CD69 (BV421, Clone FN50, BioLegend), CD107a (BV605 or APC, Clone H4A3, BioLegend),

435 CD4 (BUV 737 or BUV 395, Clone SK3, BD Biosciences), CD8 (BUV 805, Clone SK1, BD

436 Biosciences), CD3 (BUV 496, Clone UCHT1, BD Biosciences), CD45 (PerCP-Cy5.5, Clone

437 HI30, Invitrogen), PD-1 (PE-Cy7, Clone EH12.2H7, BioLegend), TIM-3 (BV510 or BV650,

438 Clone F38-2E2, BioLegend), LAG-3 (PE, Clone 3DS223H, Invitrogen), IgG1 κ isotype (PE,

439 Clone 11711, R&D Systems), IgG1  $\kappa$  isotype (PE-Cy7, Clone MOPC-21, BioLegend), IgG1  $\kappa$   
440 isotype (BV650, Clone MOPC-21, BioLegend).

441

442 The following antibodies were used for tumor cell staining:

443 CD19 (APC, Clone HIB19, BioLegend), HER2 (PE-Cy7, Clone 24D2, BioLegend), and ROR1  
444 (PE-Cy7, Clone 2A2, BioLegend).

445

446 SPICE (“Simplified Presentation of Incredibly Complex Evaluations”) plots were generated by  
447 calculating LAG-3/TIM-3/PD-1 CAR T cell populations on FlowJo and importing into SPICE  
448 software<sup>69</sup>.

449

450 Representative gating strategies for flow cytometric assays are shown in Extended Data Figure 10.

451

### 452 **Intracellular protein staining and intracellular cytokine assays**

453 Staining was performed following the manufacturer’s protocol for the Foxp3/ Transcription Factor  
454 Staining Buffer Set (eBioscience). A fixable viability dye was added (eFluor 780, eBioscience),  
455 and relevant extracellular markers were stained prior to the fixation step. Following  
456 permeabilization, cells were stained with 0.1 $\mu$ g/100,000 cells of anti-Lck/Fyn/ZAP-70/LAT/SLP-  
457 76 antibodies. Isotype controls were utilized for gating.

458

459 For intracellular cytokine assays, CAR T cells (day 18 post activation) were incubated with target  
460 cells at a 1:1 ratio for 5 hours in the presence of 1X Monensin (eBioscience) and 0.75  $\mu$ l anti-  
461 CD107a antibody/test. Following stimulation, the staining buffer set protocol was performed.  
462 0.75 $\mu$ l/condition of anti-cytokine antibodies were added following permeabilization.

463

464 The following antibodies were used for intracellular staining:

465 Lck (Alexa Fluor 647, Clone Lck-01, BioLegend), Fyn (Alexa Fluor 647, Clone FYN-01, Novus  
466 Biologicals), ZAP-70 (Alexa Fluor 647, Clone A16043B, BioLegend), LAT (Alexa Fluor 647,  
467 Clone 661002, R&D Systems), SLP-76 (Alexa Fluor 647, Clone H3, BD Biosciences), IgG1  $\kappa$   
468 isotype (Alexa Fluor 647, Clone MOPC-21, BioLegend), IgG2a  $\kappa$  isotype (Alexa Fluor 647 Clone  
469 MOPC-173, BioLegend), IgG2b  $\kappa$  isotype (Alexa Fluor 647, Clone MPC-11, BioLegend), IL-2  
470 (PE-Cy7, Clone MQ1-17H12, BioLegend), IFN $\gamma$  (BUV 395, Clone B27, BD Biosciences), TNF-  
471  $\alpha$  (BV711, Clone MAb11, BioLegend).

472

### 473 **Cytotoxicity assays**

474 CAR<sup>+</sup> T cells (day 10 post activation) were co-cultured with 50,000 tumor cells at either 1:1 or 1:2  
475 T cell to target cell ratios (E:T) in complete RPMI on 96-well flat bottom plates. Co-cultures were  
476 incubated at 37°C and imaged with an Incucyte S3 Live-Cell Analysis System (Sartorius) for  
477 approximately 72 hours. The basic analyzer feature on the Incucyte S3 software was used to  
478 quantify killing of GFP<sup>+</sup> Tumor Cells by measuring the Total Green Object Integrated Intensity  
479 over time. Fluorescent values were normalized to the initial measurement at time 0.

480

### 481 **Cytokine assays**

482 1 x 10<sup>5</sup> CAR<sup>+</sup> T cells (day 10 post activation) were co-cultured with tumor cells in a 1:1 E:T ratio  
483 in complete RPMI media and incubated at 37°C for approximately 24 hours. For cells stimulated  
484 with anti-CD3/anti-CD28 antibody coated DynaBeads (Gibco), beads were added to cells in a 3:1

485 ratio. After stimulation, the supernatants were collected, and IL-2 or IFN $\gamma$  were measured by  
486 ELISA following the manufacturer's protocol (BioLegend). Absorbances were measured with a  
487 Synergy H1 Hybrid Multi-Mode Reader (BioTek).

488

#### 489 **T cell activation assays**

490 For activation assays assessing CD69 and CD107a expression,  $1 \times 10^5$  double positive CAR T  
491 cells (day 10 post activation) were co-cultured with single CD19<sup>+</sup>, HER2<sup>+</sup>, and CD19<sup>+</sup>HER2<sup>+</sup>  
492 leukemia cells at 1:1 E:T ratios in complete RPMI media at 37°C for 4 hours in the presence 0.75  
493  $\mu$ l anti-CD107a antibody and 1X monensin (eBioscience). Cells were then washed with cold  
494 FACS buffer and staining was performed as described above.

495

#### 496 ***In vivo* xenograft models**

497 All animal studies were carried out according to Stanford Institutional Animal Care and Use  
498 Committee-approved protocols. Immunodeficient NOD-*scid* IL2Rg<sup>null</sup> (NSG, NOD.Cg-  
499 PrkdcscidIl2rgtm1Wjl/SzJl) mice were purchased from The Jackson Laboratory or bred in house.  
500 6-to-10-week-old mice were inoculated with  $1 \times 10^6$  CHLA-255 cells 7 days prior to T cell  
501 injection or  $1 \times 10^6$  ROR1<sup>+</sup>Nalm6-GL cells 1-3 days prior to T cell injection via intravenous  
502 injection (200  $\mu$ l PBS per injection). Mice were randomized to ensure even tumor burden between  
503 experimental and control groups prior to treatment.

504

505 CAR T cells were injected intravenously; CHLA-255-bearing mice received  $3 \times 10^6$  (for  
506 efficacy/survival experiments) or  $1 \times 10^7$  (for proliferation/persistence experiments) CAR<sup>+</sup> T cells  
507 (day 10 after activation), and ROR1<sup>+</sup>Nalm6-bearing mice received 6-8  $\times 10^6$  double CAR<sup>+</sup> T cells.  
508 Mice were monitored for disease progression 1-2 times per week via bioluminescence imaging  
509 (BLI) using an IVIS imaging system (Perkin Elmer). For CHLA-255 models, mice were humanely  
510 euthanized when they demonstrated morbidity or developed large solid tumor masses. For  
511 leukemia models, mice were humanely euthanized when they demonstrated morbidity or exhibited  
512 hind-leg paralysis. For the ROR1-CAR on-target/off-tumor toxicity model, mice were weighed  
513 frequently and humanely euthanized if their weight rapidly dropped 20%, or if they exhibited  
514 significant signs of distress (hunched posture, impaired mobility, rough coat, shivering).

515

#### 516 **Assessment of T cell expansion *in vivo***

517 To assess CAR T cell expansion *in vivo*, mice were sacrificed at one- and two-week timepoints  
518 following T cell infusion. Spleens and bone marrow were harvested, counted, and stained for  
519 CD4, CD8, CD45, and B7-H3 CAR as described above. T cells were gated as GFP- and CD45+.  
520 The percentages of CAR<sup>+</sup> cells and cell counts were used to calculate the absolute number of T  
521 cells present in the spleen.

522

#### 523 **Statistical Analysis**

524 Statistical analyses were performed with Excel version 16.53 (Microsoft) and GraphPad Prism  
525 9.1.0 (GraphPad). Figure legends denote group mean values  $\pm$  s.d. or s.e.m. Unless otherwise  
526 noted, analyses testing for significant differences between groups were conducted with unpaired  
527 two-tailed t-tests (when comparing two groups) or one-way ANOVA with multiple comparison  
528 correction (when comparing more than two groups). *In vivo* survival curves were compared with  
529 the log-rank Mantel-Cox test. *In vivo* tumor growth was compared with repeated-measures

530 ANOVA with multiple comparisons. *In vivo* T cell proliferation was compared using unpaired  
531 two-tailed t-tests with Welch's correction.  $p < 0.05$  was considered statistically significant.

532

### 533 **Acknowledgements**

534 This work was funded in part by the NIH Director's New Innovator Award (DP2 CA272092 to  
535 R.G.M.) and the Parker Institute for Cancer Immunotherapy (R.G.M., C.L.M). E.W.W. is  
536 supported by a Bridge Fellow Award from the Parker Institute for Cancer Immunotherapy. The  
537 authors thank Drs. Howard Chang and Ansuman Satpathy for their review of the manuscript and  
538 insightful comments. The authors also thank SciStories (Sigrid Knemeyer, Vivian Yeung, and Su  
539 Min Suh) for providing the schematics (Figures 1, 3, and 4, and Extended Data Figures 1, 4, 6, 7,  
540 and 9) and consulting on figure design.

541

### 542 **Competing Interests**

543 A.M.T., R.G.M., M.C.R., L.L., and C.L.M. are inventors on a pending patent application for the  
544 novel CARs described in this manuscript. R.G.M., C.L.M., and L.L. are co-founders of and hold  
545 equity in Syncopation Life Sciences. C.L.M. is a cofounder of and holds equity in Lyell  
546 Immunopharma. R.G.M, L.L., and E.W.W. are consultants for and hold equity in Lyell  
547 Immunopharma. S.R. is a former employee of and holds equity in Lyell Immunopharma. R.G.M.  
548 is a consultant for NKarta, Arovella Pharmaceuticals, Illumina Radiopharmaceuticals,  
549 GammaDelta Therapeutics, Aptorum Group, and Zai Labs. A.M.T. is a consultant for Syncopation  
550 Life Sciences. E.W.W. is a consultant for and holds equity in VISTAN Health.

551

### 552 **Data Availability Statement**

553 The datasets generated during this study will be uploaded with the final manuscript. CAR  
554 constructs will be made available through Material Transfer Agreements.

555

556

## 557 References

- 558 1 Majzner, R. G. & Mackall, C. L. Clinical lessons learned from the first leg of the CAR T cell  
559 journey. *Nat Med* **25**, 1341-1355, doi:10.1038/s41591-019-0564-6 (2019).
- 560 2 June, C. H. & Sadelain, M. Chimeric Antigen Receptor Therapy. *N Engl J Med* **379**, 64-73,  
561 doi:10.1056/NEJMra1706169 (2018).
- 562 3 Kloss, C. C., Condomines, M., Cartellieri, M., Bachmann, M. & Sadelain, M. Combinatorial  
563 antigen recognition with balanced signaling promotes selective tumor eradication by  
564 engineered T cells. *Nat Biotechnol* **31**, 71-75, doi:10.1038/nbt.2459 (2013).
- 565 4 Duong, C. P., Westwood, J. A., Berry, L. J., Darcy, P. K. & Kershaw, M. H. Enhancing the  
566 specificity of T-cell cultures for adoptive immunotherapy of cancer. *Immunotherapy* **3**, 33-  
567 48, doi:10.2217/imt.10.81 (2011).
- 568 5 Lanitis, E. *et al.* Chimeric antigen receptor T Cells with dissociated signaling domains  
569 exhibit focused antitumor activity with reduced potential for toxicity in vivo. *Cancer*  
570 *Immunol Res* **1**, 43-53, doi:10.1158/2326-6066.CIR-13-0008 (2013).
- 571 6 Roybal, K. T. *et al.* Engineering T Cells with Customized Therapeutic Response Programs  
572 Using Synthetic Notch Receptors. *Cell* **167**, 419-432 e416, doi:10.1016/j.cell.2016.09.011  
573 (2016).
- 574 7 Fedorov, V. D., Themeli, M. & Sadelain, M. PD-1- and CTLA-4-based inhibitory chimeric  
575 antigen receptors (iCARs) divert off-target immunotherapy responses. *Sci Transl Med* **5**,  
576 215ra172, doi:10.1126/scitranslmed.3006597 (2013).
- 577 8 Srivastava, S. *et al.* Logic-Gated ROR1 Chimeric Antigen Receptor Expression Rescues T  
578 Cell-Mediated Toxicity to Normal Tissues and Enables Selective Tumor Targeting. *Cancer*  
579 *Cell* **35**, 489-503 e488, doi:10.1016/j.ccell.2019.02.003 (2019).
- 580 9 Maldini, C. R., Ellis, G. I. & Riley, J. L. CAR T cells for infection, autoimmunity and  
581 allotransplantation. *Nat Rev Immunol* **18**, 605-616, doi:10.1038/s41577-018-0042-2  
582 (2018).
- 583 10 Amor, C. *et al.* Senolytic CAR T cells reverse senescence-associated pathologies. *Nature*  
584 **583**, 127-132, doi:10.1038/s41586-020-2403-9 (2020).
- 585 11 Fuca, G., Reppel, L., Landoni, E., Savoldo, B. & Dotti, G. Enhancing Chimeric Antigen  
586 Receptor T-Cell Efficacy in Solid Tumors. *Clin Cancer Res* **26**, 2444-2451,  
587 doi:10.1158/1078-0432.CCR-19-1835 (2020).
- 588 12 Larson, R. C. & Maus, M. V. Recent advances and discoveries in the mechanisms and  
589 functions of CAR T cells. *Nat Rev Cancer* **21**, 145-161, doi:10.1038/s41568-020-00323-z  
590 (2021).
- 591 13 Majzner, R. G. *et al.* Tuning the Antigen Density Requirement for CAR T-cell Activity.  
592 *Cancer Discov* **10**, 702-723, doi:10.1158/2159-8290.CD-19-0945 (2020).
- 593 14 Salter, A. I. *et al.* Comparative analysis of TCR and CAR signaling informs CAR designs with  
594 superior antigen sensitivity and in vivo function. *Sci Signal* **14**,  
595 doi:10.1126/scisignal.abe2606 (2021).
- 596 15 Labanieh, L., Majzner, R. G. & Mackall, C. L. Programming CAR-T cells to kill cancer. *Nat*  
597 *Biomed Eng* **2**, 377-391, doi:10.1038/s41551-018-0235-9 (2018).
- 598 16 Milone, M. C. *et al.* Engineering enhanced CAR T-cells for improved cancer therapy. *Nat*  
599 *Cancer* **2**, 780-793, doi:10.1038/s43018-021-00241-5 (2021).

- 600 17 Rafiq, S., Hackett, C. S. & Brentjens, R. J. Engineering strategies to overcome the current  
601 roadblocks in CAR T cell therapy. *Nat Rev Clin Oncol* **17**, 147-167, doi:10.1038/s41571-  
602 019-0297-y (2020).
- 603 18 Hou, A. J., Chen, L. C. & Chen, Y. Y. Navigating CAR-T cells through the solid-tumour  
604 microenvironment. *Nat Rev Drug Discov* **20**, 531-550, doi:10.1038/s41573-021-00189-2  
605 (2021).
- 606 19 Eshhar, Z., Waks, T., Gross, G. & Schindler, D. G. Specific activation and targeting of  
607 cytotoxic lymphocytes through chimeric single chains consisting of antibody-binding  
608 domains and the gamma or zeta subunits of the immunoglobulin and T-cell receptors.  
609 *Proc Natl Acad Sci U S A* **90**, 720-724, doi:10.1073/pnas.90.2.720 (1993).
- 610 20 Irving, B. A. & Weiss, A. The cytoplasmic domain of the T cell receptor zeta chain is  
611 sufficient to couple to receptor-associated signal transduction pathways. *Cell* **64**, 891-901  
612 (1991).
- 613 21 Frank, S. J. *et al.* Structural mutations of the T cell receptor zeta chain and its role in T cell  
614 activation. *Science* **249**, 174-177, doi:10.1126/science.2371564 (1990).
- 615 22 Finney, H. M., Lawson, A. D., Bebbington, C. R. & Weir, A. N. Chimeric receptors providing  
616 both primary and costimulatory signaling in T cells from a single gene product. *J Immunol*  
617 **161**, 2791-2797 (1998).
- 618 23 Pegram, H. J. *et al.* Tumor-targeted T cells modified to secrete IL-12 eradicate systemic  
619 tumors without need for prior conditioning. *Blood* **119**, 4133-4141, doi:10.1182/blood-  
620 2011-12-400044 (2012).
- 621 24 Kloss, C. C. *et al.* Dominant-Negative TGF-beta Receptor Enhances PSMA-Targeted Human  
622 CAR T Cell Proliferation And Augments Prostate Cancer Eradication. *Mol Ther* **26**, 1855-  
623 1866, doi:10.1016/j.yymthe.2018.05.003 (2018).
- 624 25 Lynn, R. C. *et al.* c-Jun overexpression in CAR T cells induces exhaustion resistance. *Nature*  
625 **576**, 293-300, doi:10.1038/s41586-019-1805-z (2019).
- 626 26 Zhao, Y. *et al.* A herceptin-based chimeric antigen receptor with modified signaling  
627 domains leads to enhanced survival of transduced T lymphocytes and antitumor activity.  
628 *J Immunol* **183**, 5563-5574, doi:10.4049/jimmunol.0900447 (2009).
- 629 27 Kochenderfer, J. N. *et al.* Eradication of B-lineage cells and regression of lymphoma in a  
630 patient treated with autologous T cells genetically engineered to recognize CD19. *Blood*  
631 **116**, 4099-4102, doi:10.1182/blood-2010-04-281931 (2010).
- 632 28 Feucht, J. *et al.* Calibration of CAR activation potential directs alternative T cell fates and  
633 therapeutic potency. *Nat Med* **25**, 82-88, doi:10.1038/s41591-018-0290-5 (2019).
- 634 29 Lamers, C. H. *et al.* Treatment of metastatic renal cell carcinoma with CAIX CAR-  
635 engineered T cells: clinical evaluation and management of on-target toxicity. *Mol Ther* **21**,  
636 904-912, doi:10.1038/mt.2013.17 (2013).
- 637 30 Lamers, C. H. *et al.* Treatment of metastatic renal cell carcinoma with autologous T-  
638 lymphocytes genetically retargeted against carbonic anhydrase IX: first clinical  
639 experience. *J Clin Oncol* **24**, e20-22, doi:10.1200/JCO.2006.05.9964 (2006).
- 640 31 Courtney, A. H., Lo, W. L. & Weiss, A. TCR Signaling: Mechanisms of Initiation and  
641 Propagation. *Trends Biochem Sci* **43**, 108-123, doi:10.1016/j.tibs.2017.11.008 (2018).



- 642 32 Palacios, E. H. & Weiss, A. Function of the Src-family kinases, Lck and Fyn, in T-cell  
643 development and activation. *Oncogene* **23**, 7990-8000, doi:10.1038/sj.onc.1208074  
644 (2004).
- 645 33 Stein, P. L., Lee, H. M., Rich, S. & Soriano, P. pp59fyn mutant mice display differential  
646 signaling in thymocytes and peripheral T cells. *Cell* **70**, 741-750, doi:10.1016/0092-  
647 8674(92)90308-y (1992).
- 648 34 Yamakami, K., Akao, S., Wakabayashi, K., Tadakuma, T. & Yoshizawa, N. Mice lacking  
649 protein tyrosine kinase fyn develop a T helper-type 1 response and resist Leishmania  
650 major infection. *Environ Health Prev Med* **6**, 132-135, doi:10.1007/BF02897960 (2001).
- 651 35 Zhao, Q., Williams, B. L., Abraham, R. T. & Weiss, A. Interdomain B in ZAP-70 regulates but  
652 is not required for ZAP-70 signaling function in lymphocytes. *Mol Cell Biol* **19**, 948-956,  
653 doi:10.1128/MCB.19.1.948 (1999).
- 654 36 Long, A. H. *et al.* 4-1BB costimulation ameliorates T cell exhaustion induced by tonic  
655 signaling of chimeric antigen receptors. *Nat Med* **21**, 581-590, doi:10.1038/nm.3838  
656 (2015).
- 657 37 Majzner, R. G. *et al.* CAR T Cells Targeting B7-H3, a Pan-Cancer Antigen, Demonstrate  
658 Potent Preclinical Activity Against Pediatric Solid Tumors and Brain Tumors. *Clin Cancer*  
659 *Res*, doi:10.1158/1078-0432.CCR-18-0432 (2019).
- 660 38 Sugawara, T. *et al.* An improved retroviral gene transfer technique demonstrates  
661 inhibition of CD4-CD8- thymocyte development by kinase-inactive ZAP-70. *J Immunol* **161**,  
662 2888-2894 (1998).
- 663 39 Au-Yeung, B. B., Shah, N. H., Shen, L. & Weiss, A. ZAP-70 in Signaling, Biology, and Disease.  
664 *Annu Rev Immunol* **36**, 127-156, doi:10.1146/annurev-immunol-042617-053335 (2018).
- 665 40 Paz, P. E. *et al.* Mapping the Zap-70 phosphorylation sites on LAT (linker for activation of  
666 T cells) required for recruitment and activation of signalling proteins in T cells. *Biochem J*  
667 **356**, 461-471, doi:10.1042/0264-6021:3560461 (2001).
- 668 41 Zhang, W. *et al.* Association of Grb2, Gads, and phospholipase C-gamma 1 with  
669 phosphorylated LAT tyrosine residues. Effect of LAT tyrosine mutations on T cell antigen  
670 receptor-mediated signaling. *J Biol Chem* **275**, 23355-23361,  
671 doi:10.1074/jbc.M000404200 (2000).
- 672 42 Balagopalan, L., Coussens, N. P., Sherman, E., Samelson, L. E. & Sommers, C. L. The LAT  
673 story: a tale of cooperativity, coordination, and choreography. *Cold Spring Harb Perspect*  
674 *Biol* **2**, a005512, doi:10.1101/cshperspect.a005512 (2010).
- 675 43 Motto, D. G., Ross, S. E., Wu, J., Hendricks-Taylor, L. R. & Koretzky, G. A. Implication of the  
676 GRB2-associated phosphoprotein SLP-76 in T cell receptor-mediated interleukin 2  
677 production. *J Exp Med* **183**, 1937-1943, doi:10.1084/jem.183.4.1937 (1996).
- 678 44 Zhang, W., Sloan-Lancaster, J., Kitchen, J., Tribble, R. P. & Samelson, L. E. LAT: the ZAP-70  
679 tyrosine kinase substrate that links T cell receptor to cellular activation. *Cell* **92**, 83-92,  
680 doi:10.1016/s0092-8674(00)80901-0 (1998).
- 681 45 Maude, S. L. *et al.* Tisagenlecleucel in Children and Young Adults with B-Cell Lymphoblastic  
682 Leukemia. *N Engl J Med* **378**, 439-448, doi:10.1056/NEJMoa1709866 (2018).
- 683 46 Neelapu, S. S. *et al.* Axicabtagene Ciloleucel CAR T-Cell Therapy in Refractory Large B-Cell  
684 Lymphoma. *N Engl J Med* **377**, 2531-2544, doi:10.1056/NEJMoa1707447 (2017).

- 685 47 Schuster, S. J. *et al.* Tisagenlecleucel in Adult Relapsed or Refractory Diffuse Large B-Cell  
686 Lymphoma. *N Engl J Med* **380**, 45-56, doi:10.1056/NEJMoa1804980 (2019).
- 687 48 Abramson, J. S. *et al.* Lisocabtagene maraleucel for patients with relapsed or refractory  
688 large B-cell lymphomas (TRANSCEND NHL 001): a multicentre seamless design study.  
689 *Lancet* **396**, 839-852, doi:10.1016/S0140-6736(20)31366-0 (2020).
- 690 49 Raje, N. *et al.* Anti-BCMA CAR T-Cell Therapy bb2121 in Relapsed or Refractory Multiple  
691 Myeloma. *N Engl J Med* **380**, 1726-1737, doi:10.1056/NEJMoa1817226 (2019).
- 692 50 Berdeja, J. G. *et al.* Ciltacabtagene autoleucel, a B-cell maturation antigen-directed  
693 chimeric antigen receptor T-cell therapy in patients with relapsed or refractory multiple  
694 myeloma (CARTITUDE-1): a phase 1b/2 open-label study. *Lancet* **398**, 314-324,  
695 doi:10.1016/S0140-6736(21)00933-8 (2021).
- 696 51 Munshi, N. C. *et al.* Idecabtagene Vicleucel in Relapsed and Refractory Multiple Myeloma.  
697 *N Engl J Med* **384**, 705-716, doi:10.1056/NEJMoa2024850 (2021).
- 698 52 Fry, T. J. *et al.* CD22-targeted CAR T cells induce remission in B-ALL that is naive or resistant  
699 to CD19-targeted CAR immunotherapy. *Nat Med* **24**, 20-28, doi:10.1038/nm.4441 (2018).
- 700 53 Gardner, R. A. *et al.* Intent-to-treat leukemia remission by CD19 CAR T cells of defined  
701 formulation and dose in children and young adults. *Blood* **129**, 3322-3331,  
702 doi:10.1182/blood-2017-02-769208 (2017).
- 703 54 Wagner, J., Wickman, E., DeRenzo, C. & Gottschalk, S. CAR T Cell Therapy for Solid Tumors:  
704 Bright Future or Dark Reality? *Mol Ther* **28**, 2320-2339, doi:10.1016/j.ymthe.2020.09.015  
705 (2020).
- 706 55 Hegde, M. *et al.* Tumor response and endogenous immune reactivity after administration  
707 of HER2 CAR T cells in a child with metastatic rhabdomyosarcoma. *Nat Commun* **11**, 3549,  
708 doi:10.1038/s41467-020-17175-8 (2020).
- 709 56 Majzner, R. G. *et al.* Abstract CT031: GD2 CAR T cells mediate clinical activity and  
710 manageable toxicity in children and young adults with DIPG and H3K27M-mutated diffuse  
711 midline gliomas. *Cancer Research* **81**, CT031-CT031, doi:10.1158/1538-7445.Am2021-  
712 ct031 (2021).
- 713 57 Pule, M. A. *et al.* Virus-specific T cells engineered to coexpress tumor-specific receptors:  
714 persistence and antitumor activity in individuals with neuroblastoma. *Nat Med* **14**, 1264-  
715 1270, doi:10.1038/nm.1882 (2008).
- 716 58 Straathof, K. *et al.* Antitumor activity without on-target off-tumor toxicity of GD2-chimeric  
717 antigen receptor T cells in patients with neuroblastoma. *Sci Transl Med* **12**,  
718 doi:10.1126/scitranslmed.abd6169 (2020).
- 719 59 Lajoie, M. J. *et al.* Designed protein logic to target cells with precise combinations of  
720 surface antigens. *Science* **369**, 1637-1643, doi:10.1126/science.aba6527 (2020).
- 721 60 Cho, J. H., Collins, J. J. & Wong, W. W. Universal Chimeric Antigen Receptors for  
722 Multiplexed and Logical Control of T Cell Responses. *Cell* **173**, 1426-1438 e1411,  
723 doi:10.1016/j.cell.2018.03.038 (2018).
- 724 61 MacKay, M. *et al.* The therapeutic landscape for cells engineered with chimeric antigen  
725 receptors. *Nat Biotechnol* **38**, 233-244, doi:10.1038/s41587-019-0329-2 (2020).
- 726 62 Jing, Y. *et al.* Expression of chimeric antigen receptor therapy targets detected by single-  
727 cell sequencing of normal cells may contribute to off-tumor toxicity. *Cancer Cell*,  
728 doi:10.1016/j.ccell.2021.09.016 (2021).

- 729 63 Parker, K. R. *et al.* Single-Cell Analyses Identify Brain Mural Cells Expressing CD19 as  
730 Potential Off-Tumor Targets for CAR-T Immunotherapies. *Cell* **183**, 126-142 e117,  
731 doi:10.1016/j.cell.2020.08.022 (2020).
- 732 64 Richards, R. M. *et al.* NOT-Gated CD93 CAR T Cells Effectively Target AML with Minimized  
733 Endothelial Cross-Reactivity. *Blood Cancer Discovery* **2**, 648-665, doi:10.1158/2643-  
734 3230.Bcd-20-0208 (2021).
- 735 65 McKeithan, T. W. Kinetic proofreading in T-cell receptor signal transduction. *Proc Natl*  
736 *Acad Sci U S A* **92**, 5042-5046, doi:10.1073/pnas.92.11.5042 (1995).
- 737 66 Lee, K. M. *et al.* Molecular basis of T cell inactivation by CTLA-4. *Science* **282**, 2263-2266,  
738 doi:10.1126/science.282.5397.2263 (1998).
- 739 67 Walker, A. J. *et al.* Tumor Antigen and Receptor Densities Regulate Efficacy of a Chimeric  
740 Antigen Receptor Targeting Anaplastic Lymphoma Kinase. *Molecular Therapy* **25**, 2189-  
741 2201, doi:10.1016/j.ymthe.2017.06.008 (2017).
- 742 68 Jena, B. *et al.* Chimeric antigen receptor (CAR)-specific monoclonal antibody to detect  
743 CD19-specific T cells in clinical trials. *PLoS One* **8**, e57838,  
744 doi:10.1371/journal.pone.0057838 (2013).
- 745 69 Roederer, M., Nozzi, J. L. & Nason, M. C. SPICE: exploration and analysis of post-  
746 cytometric complex multivariate datasets. *Cytometry A* **79**, 167-174,  
747 doi:10.1002/cyto.a.21015 (2011).
- 748

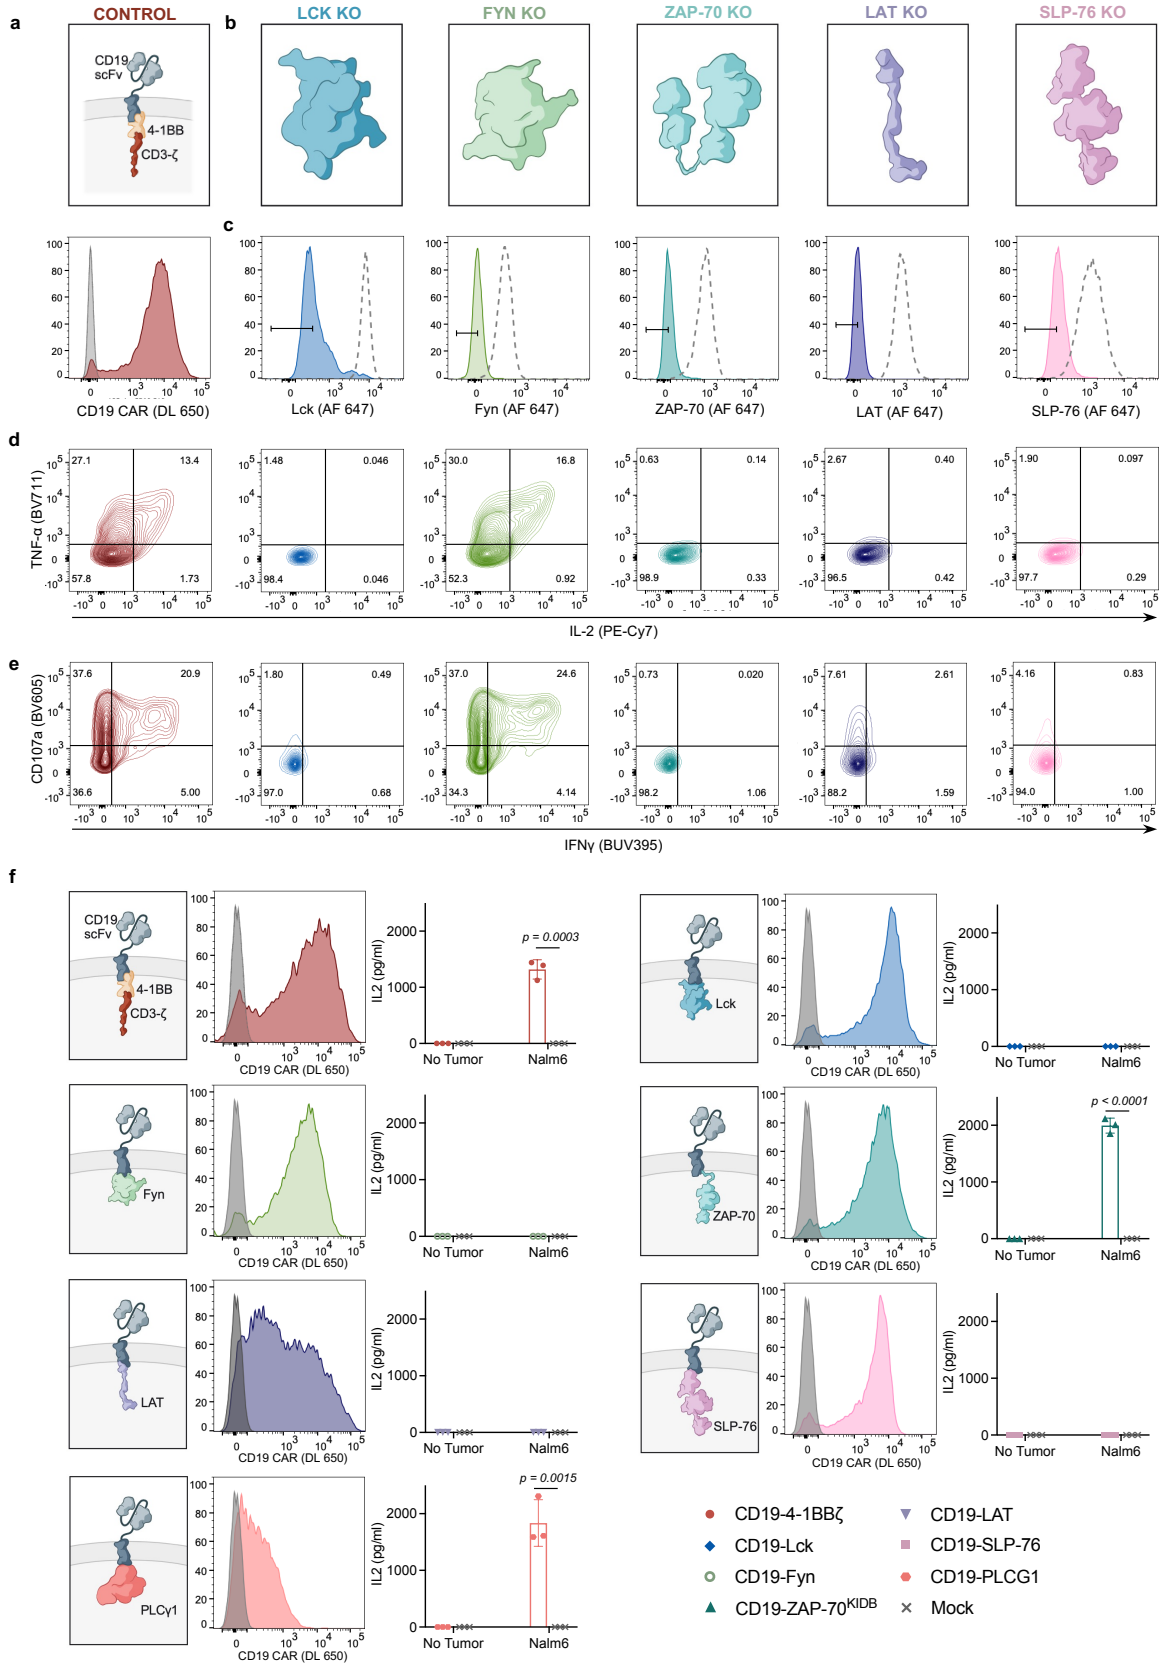

750 **Figure 1: Proximal signaling molecules are necessary and sufficient to propagate CAR T cell**  
751 **activation**

752

753 **a**, Schematic (top) and flow cytometric CAR expression (bottom) for unedited CD19-4-1BB $\zeta$  CAR  
754 T cells.

755 **b**, Schematics illustrating the five proximal signaling molecules targeted for CRISPR/Cas9-  
756 mediated knockout in CD19-4-1BB $\zeta$  CAR T cells.

757 **c**, Flow cytometric plots demonstrating knockout efficiencies for proximal signaling molecules  
758 illustrated in **b**. Dashed peaks represent the protein expression levels in unedited control cells.

759 **d-e**, After CRISPR/Cas9-mediated knockout of proximal signaling molecules depicted in **b**,  
760 CD19-4-1BB $\zeta$  CAR T cells were stimulated with Nalm6 tumor cells. Shown is flow cytometric  
761 data of TNF- $\alpha$  x IL-2 (**d**) and CD107a x IFN $\gamma$  (**e**) in knockout populations designated in **c**. Data in  
762 **a-e** is representative of three independent experiments performed with different blood donors.

763 **f**, Schematics (left), CAR expression (middle), and *in vitro* activity (right) of CD19-targeting  
764 CARs with proximal signaling endodomains. CARs incorporated full-length (Lck, Fyn, SLP-76,  
765 PLC $\gamma$ 1), intracellular (LAT), or truncated (ZAP-70, see **Extended Data Figure 1f**) domains. *In*  
766 *vitro* activity was assessed by measurement of IL-2 by ELISA in supernatant following co-culture  
767 of CAR T cells with CD19<sup>+</sup> tumor cells (Nalm6). Data shown are mean values  $\pm$  s.d of three  
768 experimental replicates. Representative of three independent experiments performed with  
769 different blood donors. *p* values were determined by the unpaired t-test (two-tailed).

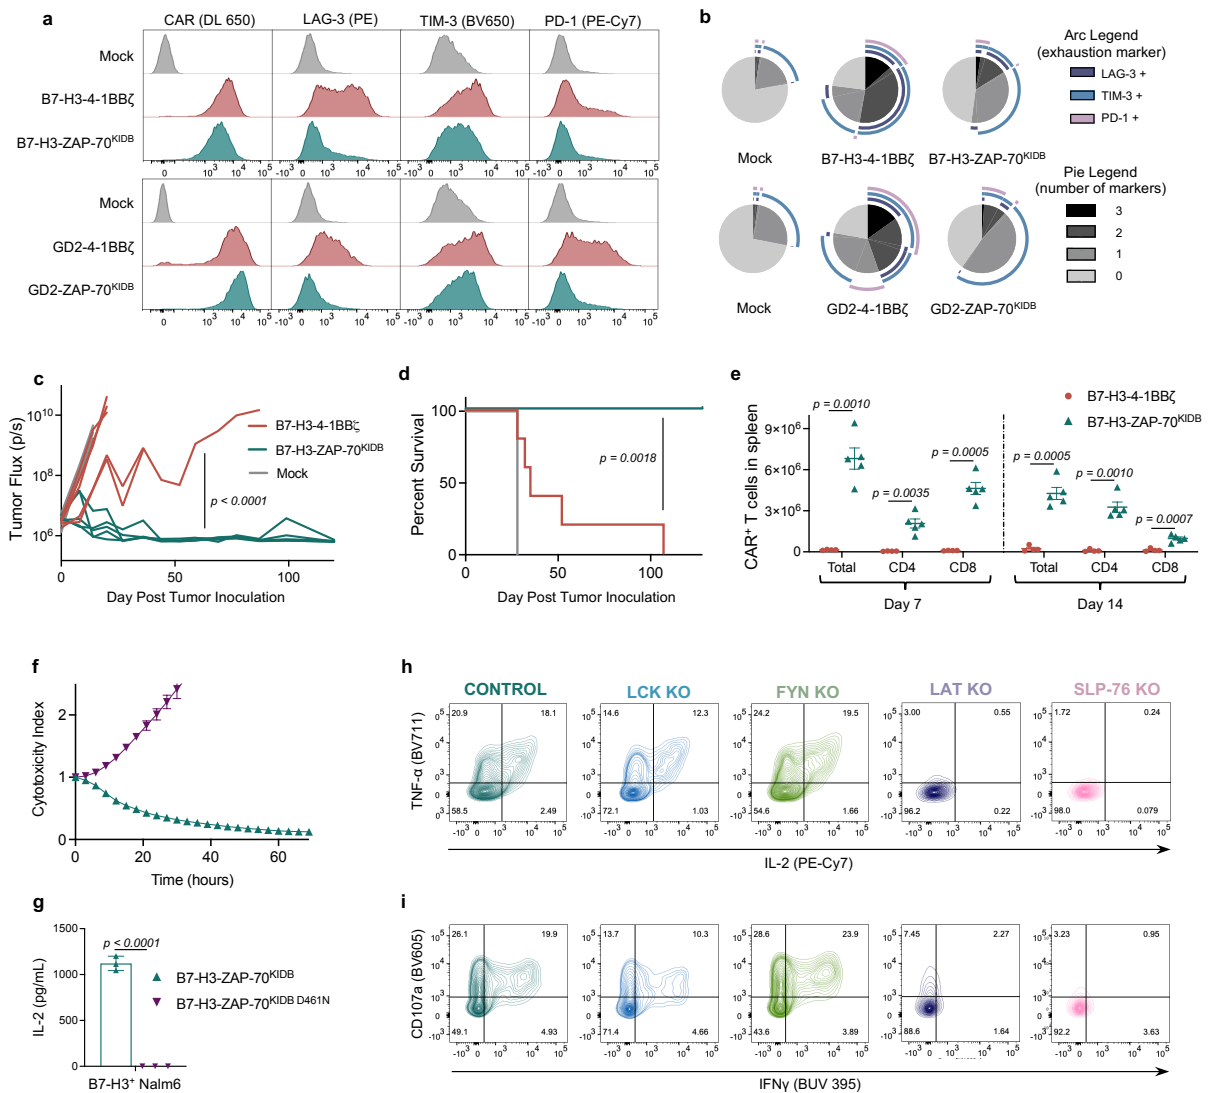

770

771

**Figure 2: ZAP-70 CARs bypass upstream signaling elements and can exhibit enhanced anti-tumor activity.**

772

773 **a**, Representative flow cytometric plots of CAR, LAG-3, TIM-3, and PD-1 expression for T cells  
774 bearing B7-H3 or GD2-specific CARs containing 4-1BB $\zeta$  or ZAP-70<sup>KIDB</sup> endodomains (day 10  
775 after T cell activation).

776 **b**, Quantified SPICE (“Simplified Presentation of Incredibly Complex Evaluations”) plots from  
777 data show in (a). Data in a-b is representative of four independent experiments with different T  
778 cell donors.

779 **c-d**, NSG mice bearing CHLA-255-luciferase xenografts were treated intravenously with B7-H3-  
780 4-1BB $\zeta$  or B7-H3-ZAP-70<sup>KIDB</sup> CAR T cells. (c) Quantification of tumor progression for each  
781 individual mouse as measured by flux values acquired via bioluminescence imaging (BLI). (d)  
782 Survival curves for mice bearing tumors shown in (c). Data is representative of three independent  
783 experiments with three different donors (n=5 mice per group in each experiment).  $p$  value in c was  
784 determined by repeated measures one way ANOVA with correction for multiple comparisons and  
785 d was determined by the Log-rank test.

786 **e**, Absolute number of CAR T cells recovered from the spleens of CHLA-255-bearing mice on  
787 days 7 and 14 after treatment with B7-H3-4-1BB $\zeta$  or B7-H3-ZAP-70<sup>KIDB</sup> CAR T cells. Shown are  
788 mean values  $\pm$  s.e.m. for n=4-5 mice per group per timepoint. Experiment was performed once at  
789 two timepoints. *p* values were determined by unpaired t-test (two-tailed) with Welch's correction.  
790 **f**, Tumor cell killing of B7-H3<sup>+</sup> Nalm6-GFP cells co-cultured with B7-H3-ZAP-70<sup>KIDB</sup> ( $\pm$  D461N  
791 mutation) CAR T cells at a 1:1 ratio of T cells to tumor cells. Shown are mean values  $\pm$  s.d. of  
792 three experimental replicates. Representative of two independent experiments with different T cell  
793 donors.  
794 **g**, IL-2 secretion (as measured by ELISA) by B7-H3-ZAP-70<sup>KIDB</sup> ( $\pm$  D461N mutation) CAR T  
795 cells following co-culture with B7-H3<sup>+</sup> Nalm6 cells. Shown are mean values  $\pm$  s.d. of three  
796 experimental replicates. *p* values were determined by the unpaired t-test (two-tailed).  
797 Representative of two independent experiments with different T cell donors.  
798 **h-i**, After CRISPR/Cas9-mediated knockout of the indicated proximal signaling molecules, B7-  
799 H3-ZAP-70<sup>KIDB</sup> CAR T cells were stimulated with B7-H3<sup>+</sup>Nalm6 tumor cells. Shown is flow  
800 cytometric data of TNF- $\alpha$  x IL-2 (**h**) and CD107a x IFN $\gamma$  (**i**) in knockout populations designated  
801 in **Extended Data Figure 3e**. Data in **h-i** is representative of three independent experiments  
802 performed with two different blood donors.

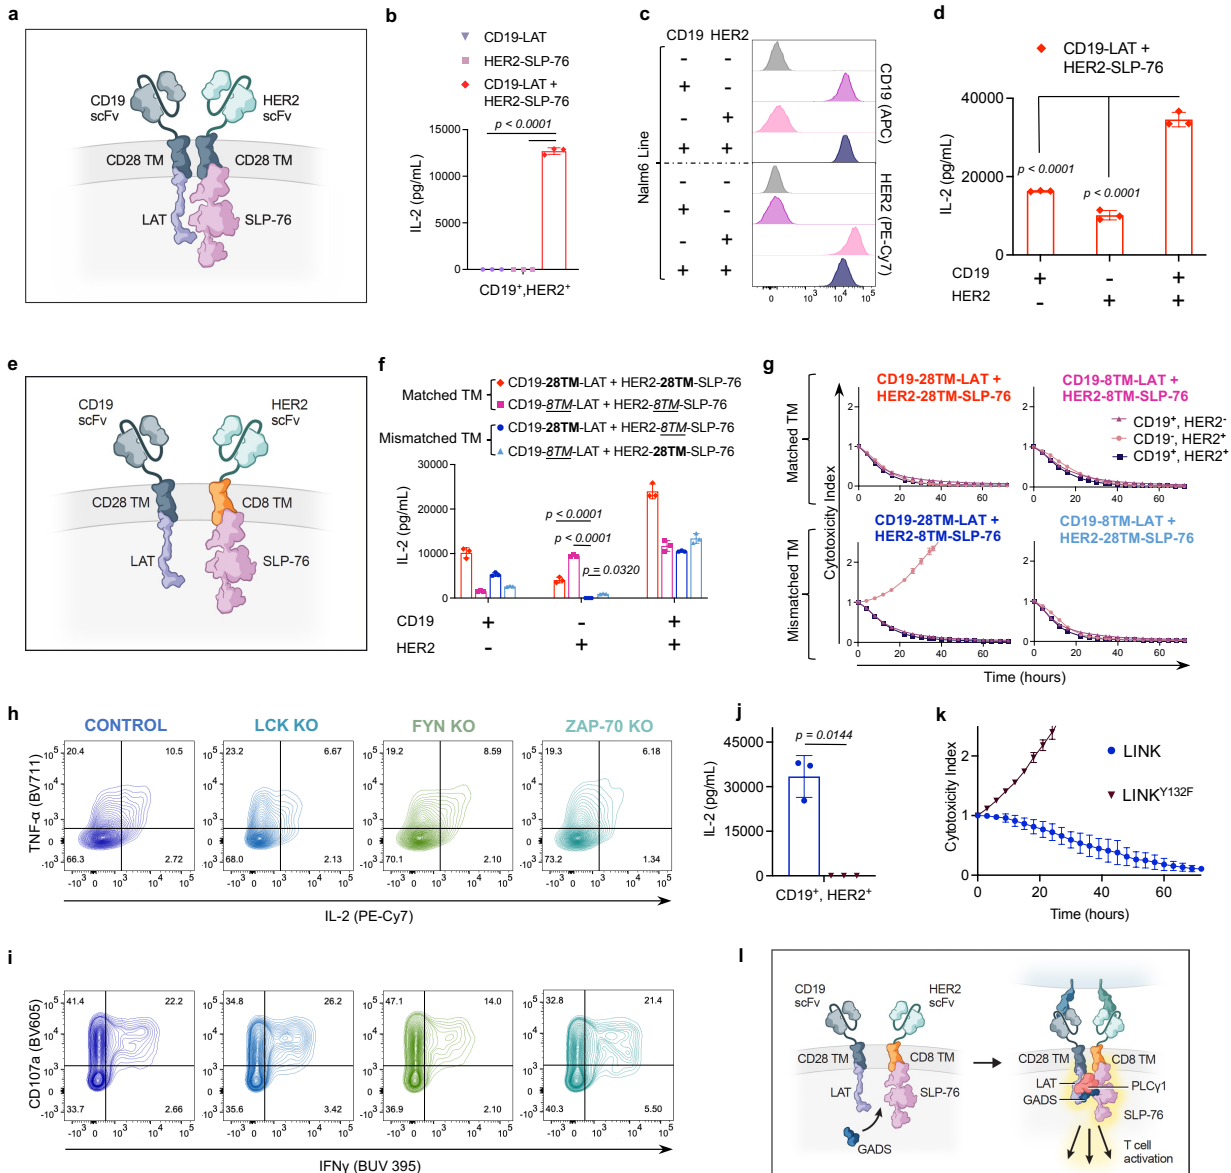

803  
804 **Figure 3: LAT and SLP-76 CARs bypass upstream signaling elements and function together**  
805 **as a Boolean logic AND-gate.**

806  
807 **a**, Schematic illustrating LAT and SLP-76 CARs co-expressed on one T cell.  
808 **b**, IL-2 secretion (as measured by ELISA) by CD19-LAT, HER2-SLP-76, or CD19-LAT + HER2-  
809 SLP-76 CAR T cells following co-culture with HER2<sup>+</sup> Nalm6 (CD19<sup>+</sup>, HER2<sup>+</sup>). Shown are mean  
810 values ± s.d. of three experimental replicates. Representative of eight independent experiments  
811 with different T cell donors. *p* values were determined by one way ANOVA with correction for  
812 multiple comparisons.  
813 **c**, Flow cytometry plots of CD19 and HER2 expression on engineered Nalm6 lines.  
814 **d**, IL-2 secretion (as measured by ELISA) by CD19-LAT + HER2-SLP-76 CAR T cells



815 following co-culture with cell lines shown in **c**. Shown are mean values  $\pm$  s.d. of three experimental  
816 replicates. Representative of eight independent experiments with different T cell donors. *p* values  
817 were determined by one way ANOVA with correction for multiple comparisons.

818 **e**, Schematic illustrating LAT and SLP-76 CARs with mismatched hinge-transmembrane (TM)  
819 domains co-expressed on one T cell.

820 **f**, IL-2 secretion (as measured by ELISA) by CD19-LAT + HER2-SLP-76 CAR T cells with the  
821 indicated hinge-transmembrane (TM) regions following co-culture with cell lines shown in **c**.  
822 Shown are mean values  $\pm$  s.d. of three experimental replicates. Representative of three independent  
823 experiments with different T cell donors. *p* values were determined by one way ANOVA with  
824 correction for multiple comparisons.

825 **g**, Tumor cell killing of cell lines shown in **c** co-cultured with CD19-LAT + HER2-SLP-76 CAR  
826 T cells with the indicated hinge-transmembrane (TM) regions at a 1:1 ratio of T cells to tumor  
827 cells. Shown are mean values  $\pm$  s.d. of three experimental replicates. Representative of three  
828 independent experiments with different T cell donors.

829 **h-i**, After CRISPR/Cas9-mediated knockout of the indicated proximal signaling molecules, LINK  
830 (CD19-28TM-LAT + HER2-8TM-SLP-76) CAR T cells were stimulated with HER2<sup>+</sup>Nalm6  
831 (CD19<sup>+</sup>, HER2<sup>+</sup>) tumor cells. Shown is flow cytometric data of TNF- $\alpha$  x IL-2 (**h**) and CD107a x  
832 IFN $\gamma$  (**i**) in knockout populations designated in **Extended Data Figure 5b**. Data in **h-i** is  
833 representative of two independent experiments performed with different blood donors.

834 **j**, IL-2 secretion (as measured by ELISA) by CD19-28TM-LAT + HER2-8TM-SLP-76 ( $\pm$   
835 LAT<sup>Y132F</sup> mutation) CAR T cells following co-culture with HER2<sup>+</sup>Nalm6 (CD19<sup>+</sup>, HER2<sup>+</sup>) tumor  
836 cells. Shown are mean values  $\pm$  s.d. of three experimental replicates. Representative of four  
837 independent experiments with different T cell donors. *p* value was determined by the unpaired t-  
838 test (two-tailed).

839 **k**, Tumor cell killing of HER2<sup>+</sup>Nalm6 (CD19<sup>+</sup>, HER2<sup>+</sup>) cells co-cultured with CD19-28TM-LAT  
840 + HER2-8TM-SLP-76 ( $\pm$  LAT<sup>Y132F</sup> mutation) CAR T cells at a 1:1 ratio of T cells to tumor cells.  
841 Shown are mean values  $\pm$  s.d. of three experimental replicates. Representative of four independent  
842 experiments with different T cell donors.

843 **l**, Schematic illustrating the potential mechanism of LINK CAR activity.

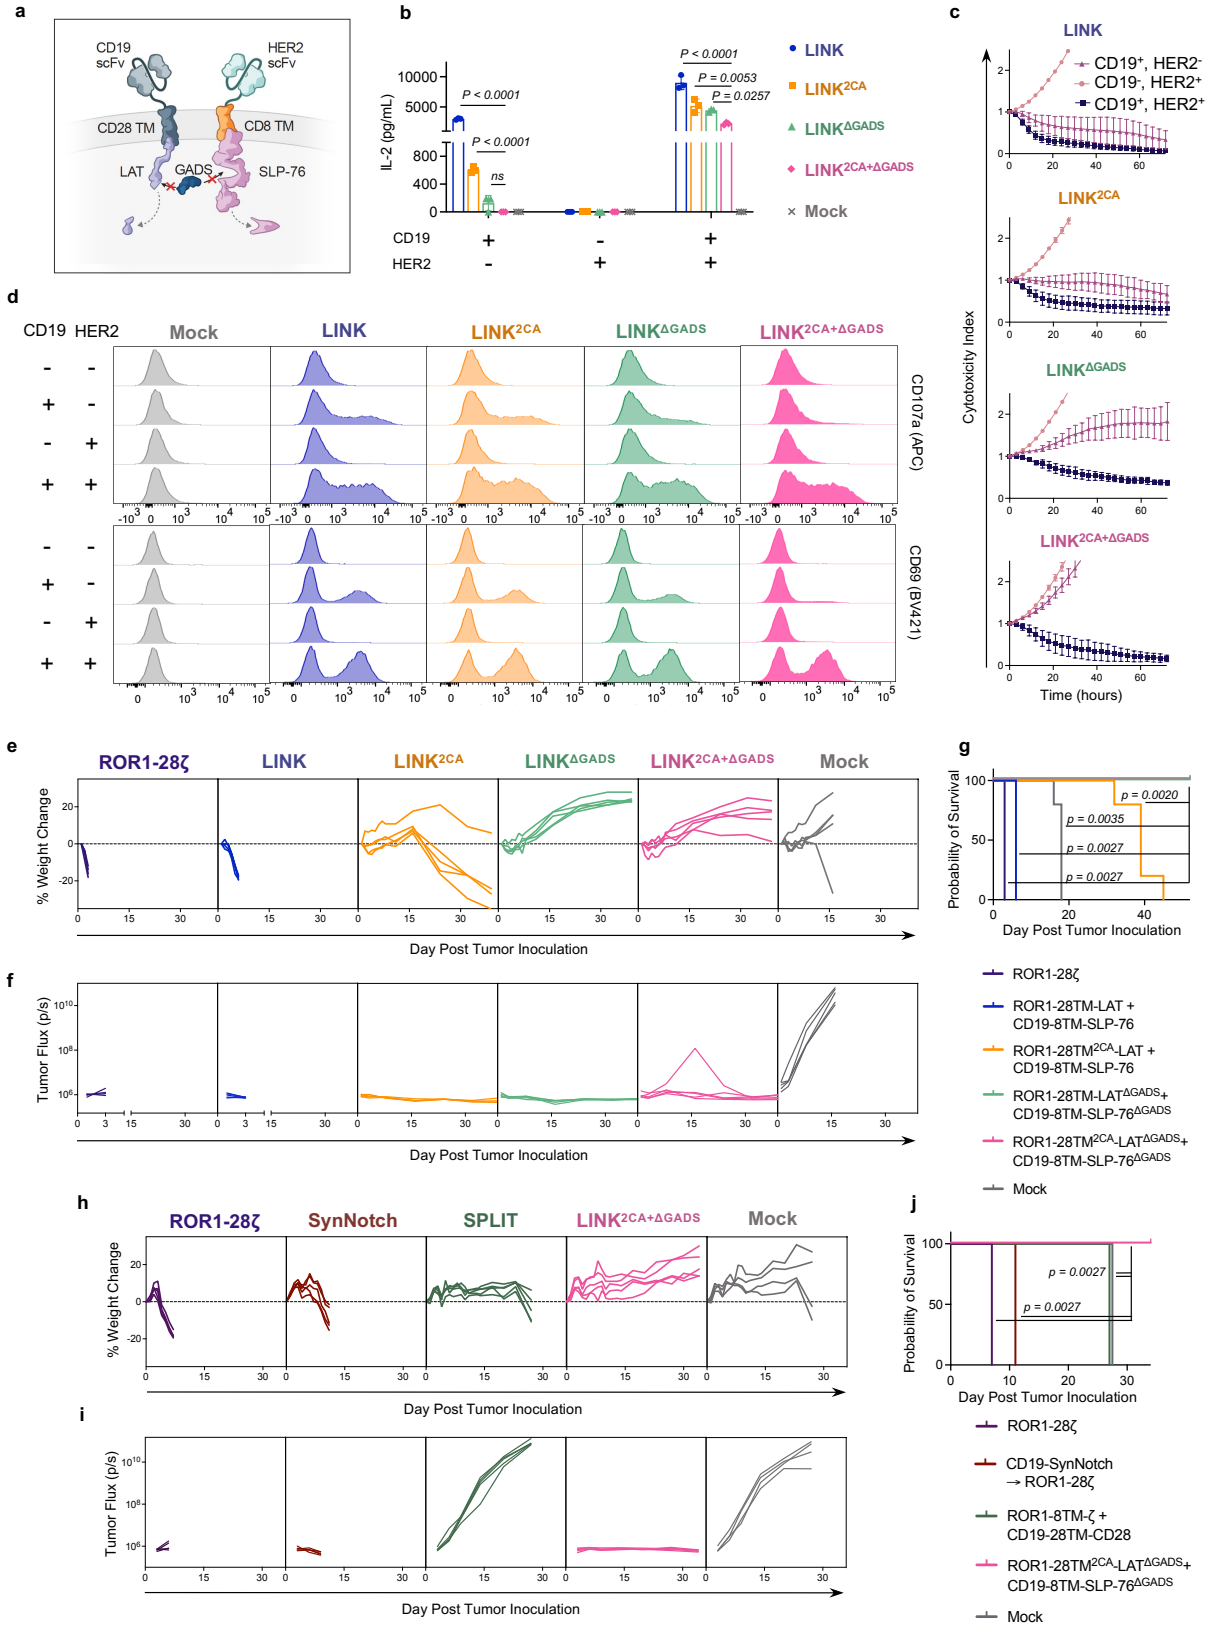

845 **Figure 4: LINK CAR mediates tumor eradication while preventing on-target, off-tumor**  
846 **toxicity**

847

848 **a**, Schematic illustrating truncation of the GADS-binding regions in the LAT and SLP-76 CAR  
849 endodomains.

850 **b**, IL-2 secretion (as measured by ELISA) by indicated LINK CAR T cells following co-culture  
851 with cell lines shown in **Figure 3c**. Shown are mean values  $\pm$  s.d. of three experimental replicates.  
852 Representative of five independent experiments with four different T cell donors. *p* values were  
853 determined by one way ANOVA with correction for multiple comparisons.

854 **c**, Tumor cell killing of cell lines shown in **Figure 3c** by indicated LINK CAR T cells at a 1:1 ratio  
855 of T cells to tumor cells. Shown are mean values  $\pm$  s.d. of three experimental replicates.  
856 Representative of five independent experiments with four different T cell donors.

857 **d**, Flow cytometric plots of T cell degranulation (CD107a, top) and activation (CD69, bottom) on  
858 indicated LINK CAR T cells following co-culture with cell lines shown in **Figure 3c**.  
859 Representative of 5 independent experiments with four different T cell donors.

860 **e-g**, NSG mice bearing ROR1<sup>+</sup>Nalm6-luciferase were treated with the indicated CAR T cells. **(e)**  
861 Weights for individual mice over time plotted as a percentage of the weight on day 0. **(f)**  
862 Quantification of tumor progression for each individual mouse as measured by flux values  
863 acquired via bioluminescence imaging (BLI). **(g)** Survival curves for mice bearing tumors shown  
864 in **f**. *p* values were determined by the Log-rank test. Data for **e-g** is representative of three  
865 independent experiments with two different blood donors each performed with n=5 mice per  
866 group. Note that in one of three experiments, the LINK<sup>2CA</sup> mice did not lose enough weight to be  
867 euthanized.

868 **h-j**, NSG mice bearing ROR1<sup>+</sup>Nalm6-luciferase were treated with the indicated CAR T cells and  
869 logic-gated CAR T cell systems. **(h)** Weights for individual mice over time plotted as a percentage  
870 of the weight on day 0. **(i)** Quantification of tumor progression for each individual mouse as  
871 measured by flux values acquired via bioluminescence imaging (BLI). **(j)** Survival curves for mice  
872 bearing tumors shown in **i**. *p* values were determined by the Log-rank test. N=5 mice per group.

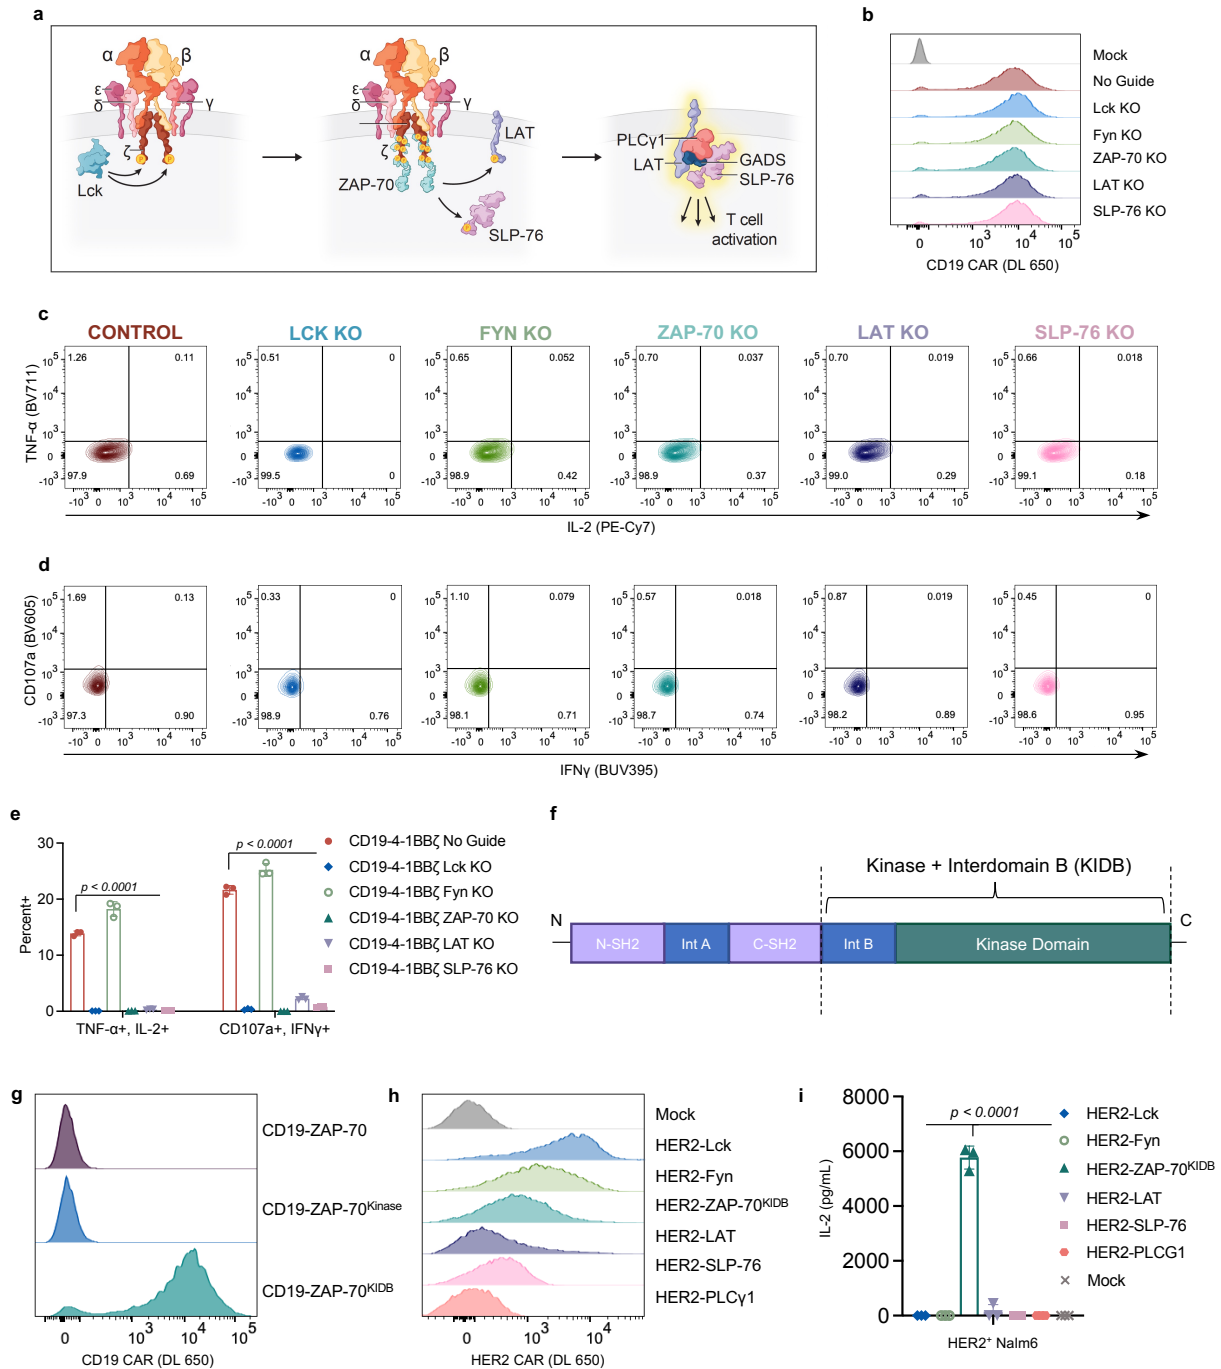

873  
874  
875  
876

## Extended Data Figure 1: Essential Proximal Signaling Molecules for CD19-4-1BB $\zeta$ CAR signal

877 **a**, Schematic illustrating the TCR signaling pathway wherein Lck phosphorylates ITAM motifs in  
878 CD3 $\zeta$ , creating a binding site for ZAP-70. ZAP-70 is then activated and phosphorylates adapter  
879 proteins LAT and SLP-76. LAT and SLP-76 then form a scaffold for recruitment of PLC $\gamma$ 1 and  
880 other downstream effector molecules that initiate T cell activation.

881 **b**, Flow cytometric data exhibiting CD19-4-1BB $\zeta$  CAR expression in unedited and edited T cells  
882 prior to stimulation.

883 **c-d**, Flow cytometric plots of TNF- $\alpha$  x IL-2 (**c**) and CD107a x IFN $\gamma$  (**d**) in unstimulated unedited  
884 and edited CD19-4-1BB $\zeta$  CAR T cells. Data is representative of three independent experiments  
885 performed with different blood donors.

886 **e**, Quantification of TNF- $\alpha$ <sup>+</sup>IL-2<sup>+</sup> and CD107a<sup>+</sup>IFN $\gamma$ <sup>+</sup> populations as shown in **Figure 1d-e**.  
887 Baseline measurements from the unstimulated controls were subtracted from stimulated  
888 conditions. Shown are mean values  $\pm$  s.d. of three experimental replicates. *p* values were obtained  
889 by one way ANOVA with multiple comparisons.

890 **f**, Schematic illustrating the protein domains of ZAP-70; dashed lines indicate the Kinase +  
891 Interdomain B (KIDB) region contained in the ZAP-70<sup>KIDB</sup> CAR.

892 **g**, Flow cytometric data exhibiting expression of CD19-ZAP-70, CD19-ZAP-70<sup>Kinase</sup>, and CD19-  
893 ZAP-70<sup>KIDB</sup> CARs.

894 **h**, Flow cytometric data exhibiting expression of HER2-targeting proximal signaling CARs.

895 **i**, IL-2 secretion (as measured by ELISA) by HER2-targeting proximal signaling CARs following  
896 co-culture with HER2<sup>+</sup>Nalm6 tumor cells. Shown are mean values  $\pm$  s.d. of three experimental  
897 replicates. Representative of three independent experiments with different T cell donors. *p* values  
898 were obtained by one way ANOVA with multiple comparisons.  
899

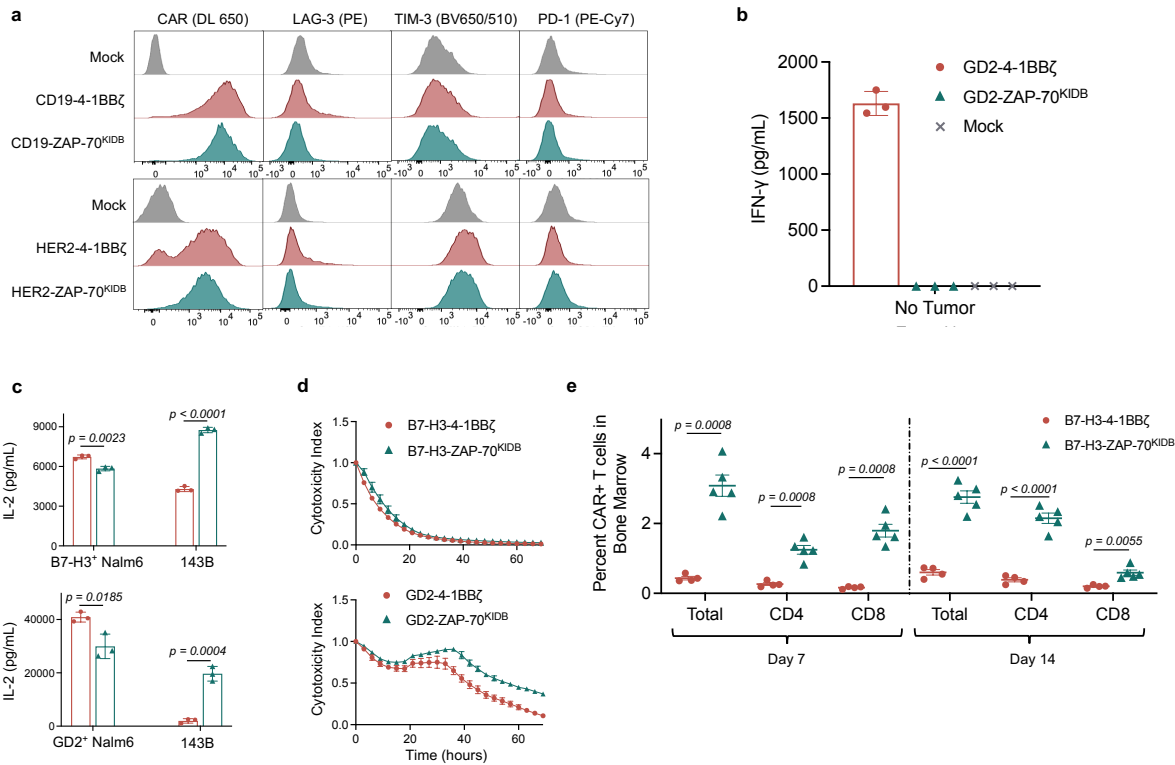

900  
901  
902

## Extended Data Figure 2: ZAP-70 CAR T cells demonstrate potent *in vitro* and *in vivo* activity

903 **a**, Representative flow cytometric plots of CAR, LAG-3, TIM-3, and PD-1 expression for T cells  
904 bearing CD19 or HER2-specific CARs containing 4-1BB $\zeta$  or ZAP-70<sup>KIDB</sup> endodomains (day 10  
905 after T cell activation). Representative of two experiments with different T cell donors.

906 **b**, IFN $\gamma$  secretion (as measured by ELISA) by GD2-4-1BB $\zeta$  and GD2-ZAP-70<sup>KIDB</sup> CAR T cells  
907 following 24hr culture in the absence of target cells. Shown are mean values  $\pm$  s.d. of three  
908 experimental replicates. Representative of three experiments with different T cell donors.

909 **c**, IL-2 secretion (as measured by ELISA) by B7-H3 or GD2-specific CAR T cells containing  
910 ZAP-70<sup>KIDB</sup> or 4-1BB $\zeta$  endodomains following co-culture with Nalm-6 cells expressing B7-  
911 H3/GD2 or 143B osteosarcoma cells. Shown are mean values  $\pm$  s.d. of three experimental  
912 replicates. Representative of four independent experiments with different T cell donors.  $p$  values  
913 were determined by the unpaired t-test (two-tailed).

914 **d**, Tumor cell killing of GFP<sup>+</sup> human neuroblastoma CHLA-255 cells co-cultured with B7-H3 or  
915 GD2-specific CAR T cells containing ZAP-70<sup>KIDB</sup> or 4-1BB $\zeta$  endodomains for at a 1:1 ratio of T  
916 cells to tumor cells. Shown are mean values  $\pm$  s.d. of three experimental replicates. Representative  
917 of four independent experiments with different T cell donors.

918 **e**, Percent CAR<sup>+</sup> T cells recovered from the bone marrow of CHLA-255-bearing mice on days 7  
919 and 14 after treatment with B7-H3-4-1BB $\zeta$  or B7-H3-ZAP-70<sup>KIDB</sup> CAR T cells. Shown are mean  
920 values  $\pm$  s.e.m. for n=4-5 mice per group per timepoint. Experiment was performed once at two  
921 timepoints.  $p$  values were determined by unpaired t-test (two-tailed) with Welch's correction.

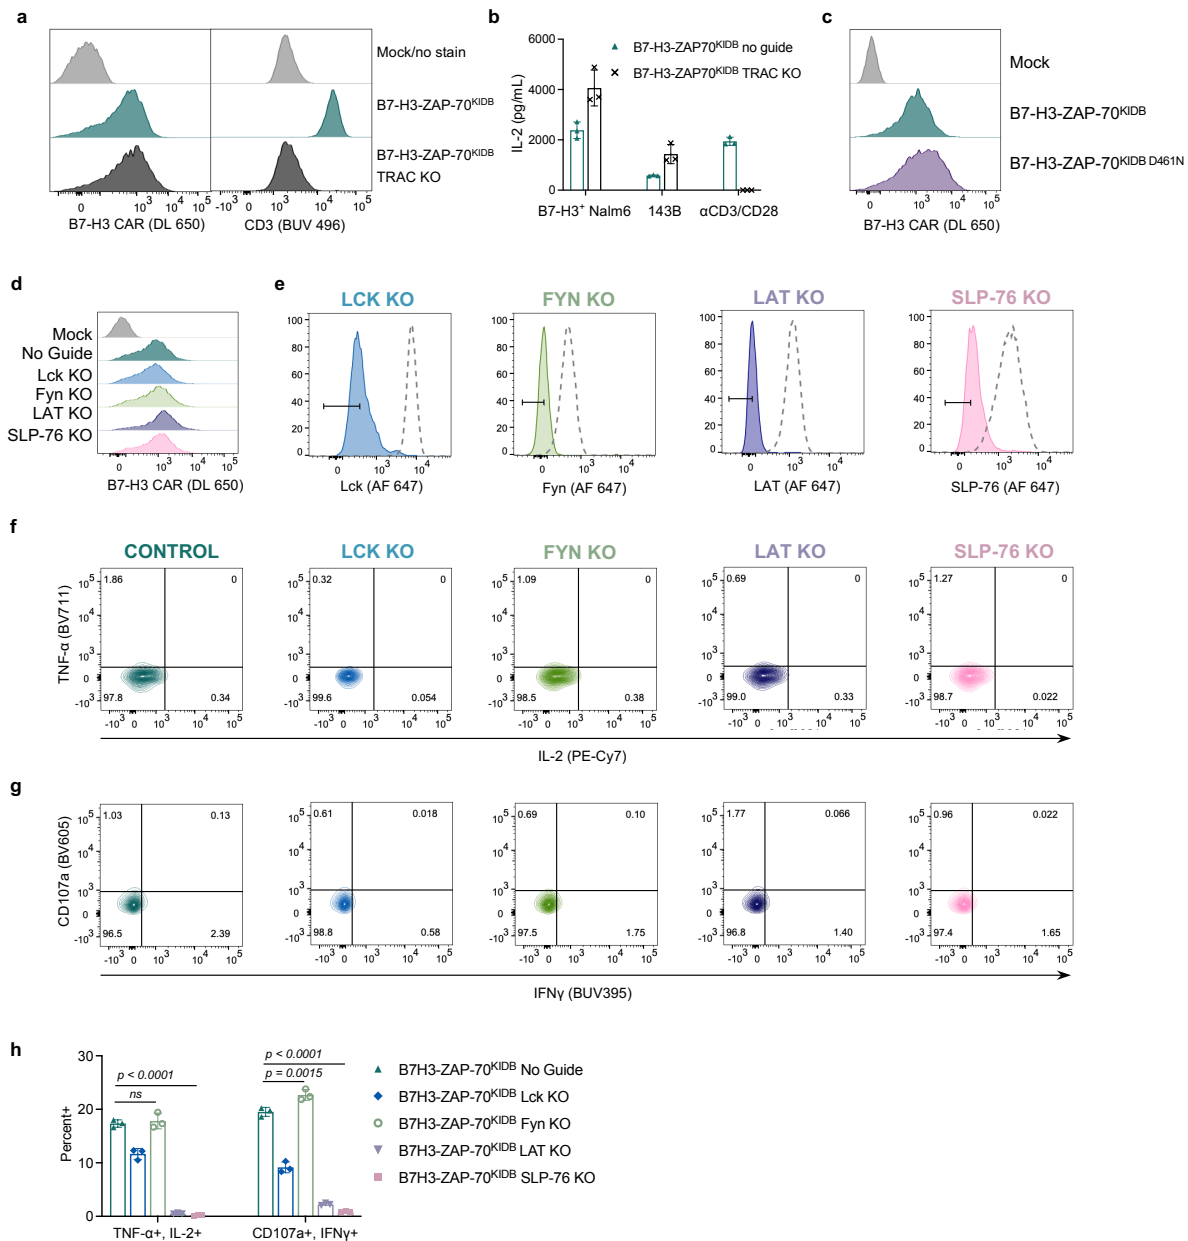

922

923 **Extended Data Figure 3: Mechanisms of signaling in B7-H3-ZAP-70<sup>KIDB</sup> CAR T cells.**

924

925 **a**, Flow cytometric data exhibiting surface CAR and CD3 expression of B7-H3-ZAP-70 (± TRAC  
926 knockout)

927 **b**, IL-2 secretion (as measured by ELISA) by B7-H3-ZAP-70 (± TRAC knockout) CAR T cells  
928 shown in **a**. Shown are mean values ± s.d. of three experimental replicates. Representative of two  
929 experiments with different T cell donors.

930 **c**, Flow cytometric data exhibiting the expression of B7-H3-ZAP-70<sup>KIDB</sup> CARs ± kinase-ablating  
931 D461N mutation.

932 **d**, Flow cytometric data exhibiting B7-H3-ZAP-70<sup>KIDB</sup> CAR expression in unedited and edited T  
933 cells prior to stimulation.

934 **e**, Flow cytometric plots demonstrating knockout efficiencies for proximal signaling molecules in  
935 CAR T cells shown in **d**.

936 **f-g**, Flow cytometric plots of TNF- $\alpha$  x IL-2 (**f**) and CD107a x IFN $\gamma$  (**g**) in unstimulated unedited  
937 and edited B7-H3-ZAP-70<sup>KIDB</sup> CAR T cells. Data is representative of three independent  
938 experiments performed with two different T cell donors.

939 **h**, Quantification of TNF- $\alpha$ <sup>+</sup>IL-2<sup>+</sup> and CD107a<sup>+</sup>IFN $\gamma$ <sup>+</sup> populations as shown in **Figure 2h-i**.  
940 Baseline measurements from the unstimulated controls were subtracted from the stimulated  
941 conditions. Shown are mean values  $\pm$  s.d. of three experimental replicates. *p* values were obtained  
942 by one way ANOVA with multiple comparisons.

943



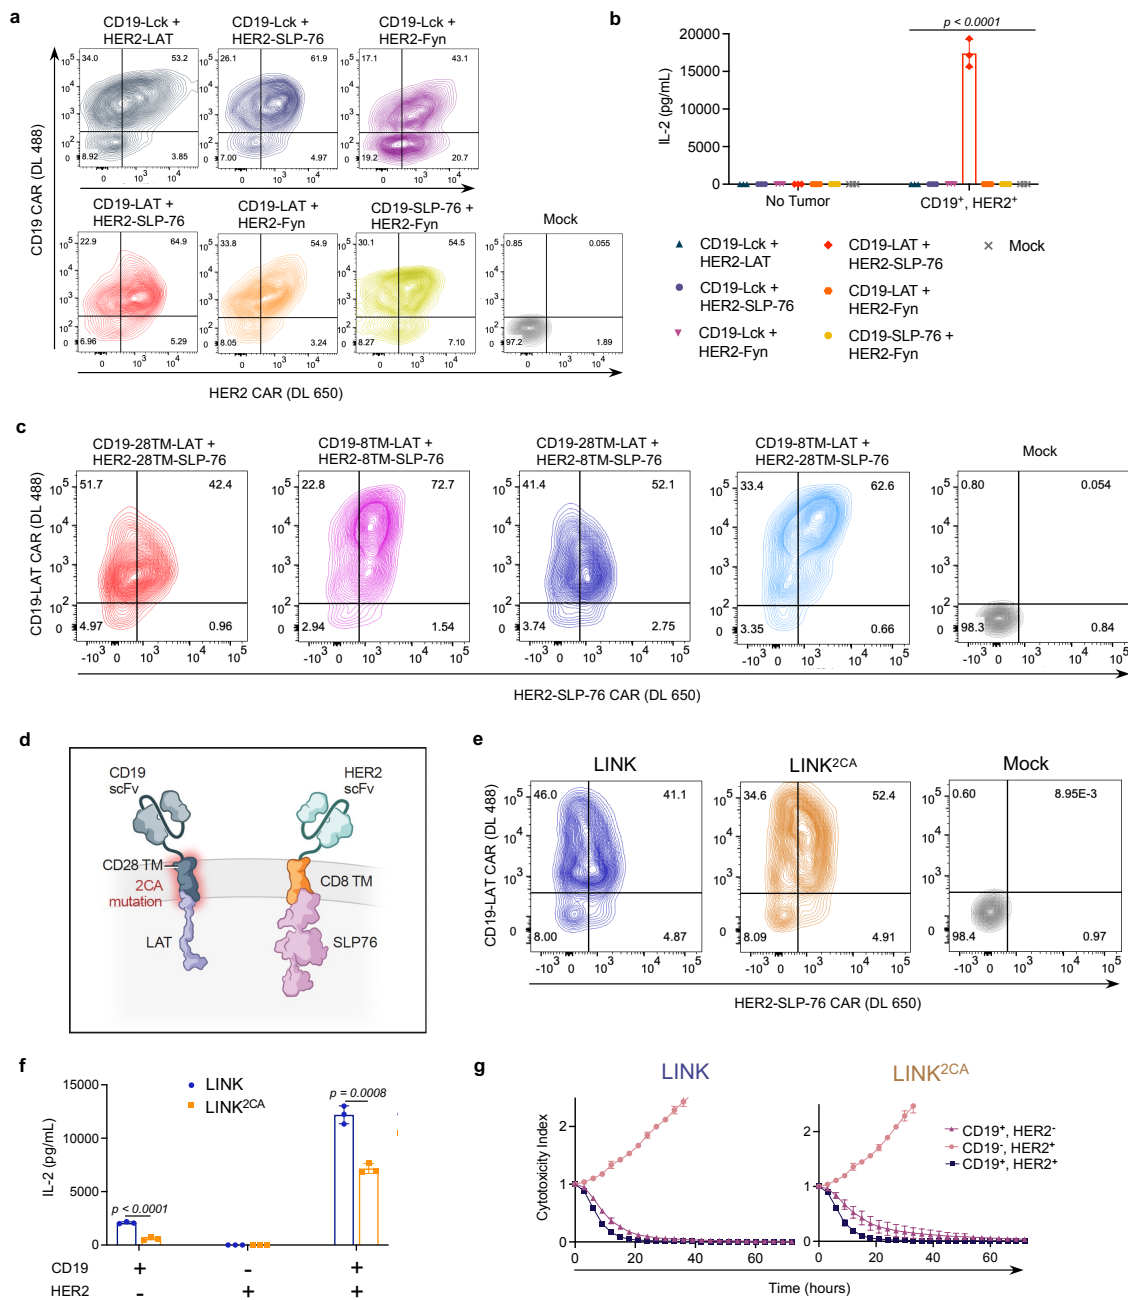

944  
945  
946

## Extended Data Figure 4: LAT and SLP-76 CARs jointly mediate T cell activation.

947 **a**, Flow cytometric data exhibiting CAR expression of co-transduced CD19 and Her2 proximal  
948 signaling CAR (Lck, Fyn, LAT, and SLP-76) combinations.

949 **b**, IL-2 secretion (as measured by ELISA) by T cells from **a** following coculture with  
950 HER2<sup>+</sup>Nalm6 (CD19<sup>+</sup>, HER2<sup>+</sup>) cells. Shown are mean values ± s.d. of three experimental  
951 replicates. Representative of four experiments performed with three different T cell donors. *p*  
952 values were obtained by one way ANOVA with multiple comparisons.

953 **c**, Flow cytometric expression of LAT and SLP-76 CARs on T cells utilized in assays in **Figure**  
954 **3f-g** on.

955 **d**, Schematic illustrating incorporation of a dual Cysteine-to-Alanine (2CA) mutation in the CD28  
956 hinge-transmembrane (TM) domain of the LAT CAR component of the LINK system.

957 **e**, Flow cytometric expression of LINK CAR components ( $\pm$ 2CA mutation).

958 **f**, IL-2 secretion (as measured by ELISA) by LINK CAR T cells ( $\pm$ 2CA mutation) following co-  
959 culture with cell lines shown in **Figure 3c**. Shown are mean values  $\pm$  s.d. of three experimental  
960 replicates. Representative of eight independent experiments performed with five different T cell  
961 donors. *p* values were obtained by unpaired two-tailed t-tests.

962 **g**, Tumor cell killing of cell lines shown in **Figure 3c** co-cultured with LINK CAR T cells ( $\pm$ 2CA  
963 mutation) at a 2:1 ratio of T cells to tumor cells. Shown are mean values  $\pm$  s.d. of three experimental  
964 replicates. Representative of eight independent experiments performed with five different T cell  
965 donors.

966

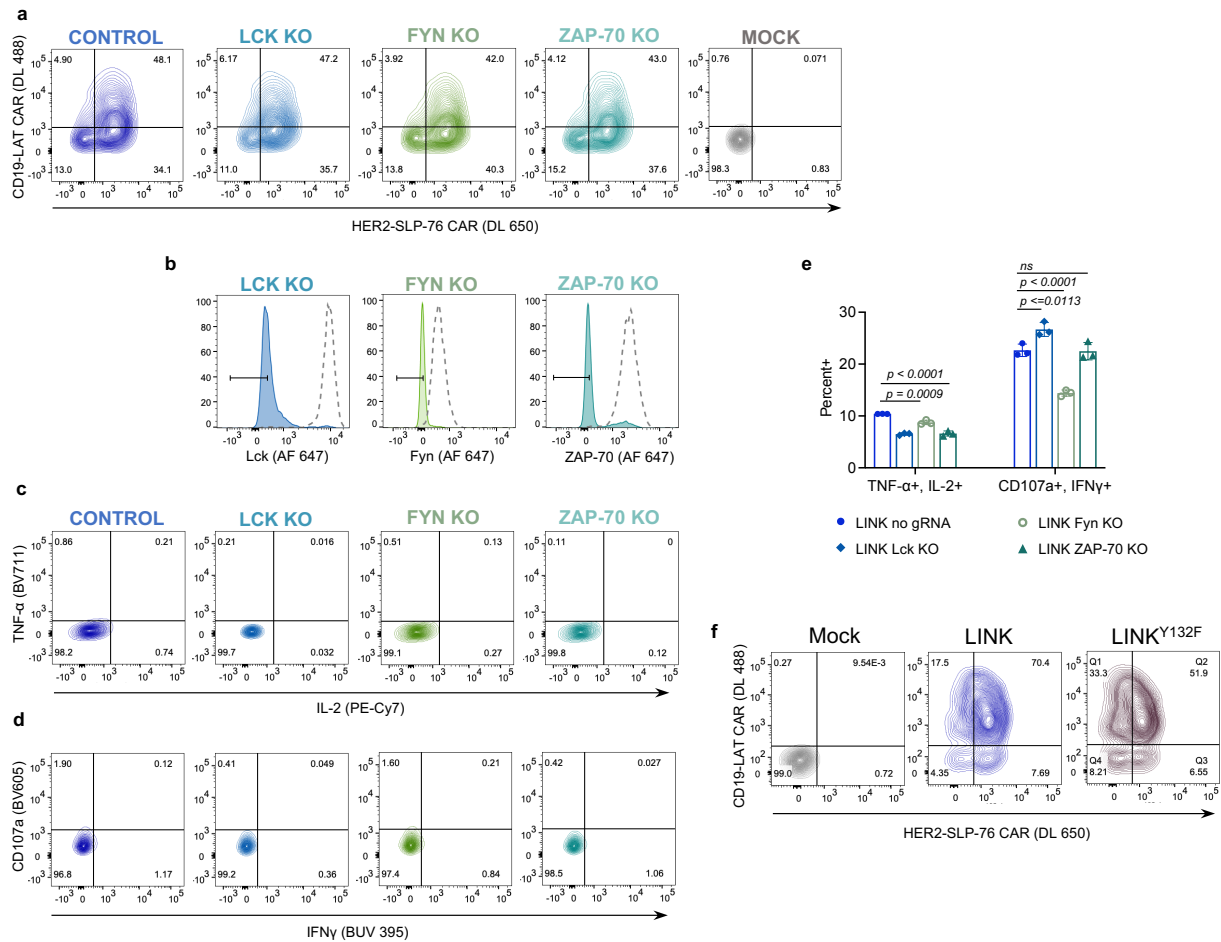

967  
968

969 **Extended Data Figure 5: Knockout of proximal signaling proteins in LINK CAR T cells.**

970

971 **a**, Flow cytometric data exhibiting LINK CAR (CD19-28<sup>TM</sup>-LAT + HER2-8<sup>TM</sup>-SLP-76)  
972 expression in unedited and edited T cells prior to stimulation with HER2<sup>+</sup> Nalm6.

973 **b**, Flow cytometric plots demonstrating knockout efficiencies for proximal signaling molecules in  
974 CAR T cells shown in **a**.

975 **c-d**, Flow cytometric plots of TNF- $\alpha$  x IL-2 (**c**) and CD107a x IFN $\gamma$  (**d**) in unstimulated unedited  
976 and edited LINK CAR T cells. Data is representative of two independent experiments performed  
977 with different T cell donors.

978 **e**, Quantification of TNF- $\alpha$ <sup>+</sup>IL-2<sup>+</sup> and CD107a<sup>+</sup>IFN $\gamma$ <sup>+</sup> populations as shown in **Figure 3h-i**.  
979 Baseline measurements from the unstimulated controls were subtracted from the stimulated  
980 conditions. Shown are mean values  $\pm$  s.d. of three experimental replicates. *p* values were obtained  
981 by one way ANOVA with multiple comparisons.

982

**f**, Flow cytometric expression of LINK CAR ( $\pm$ LAT<sup>Y132F</sup>).

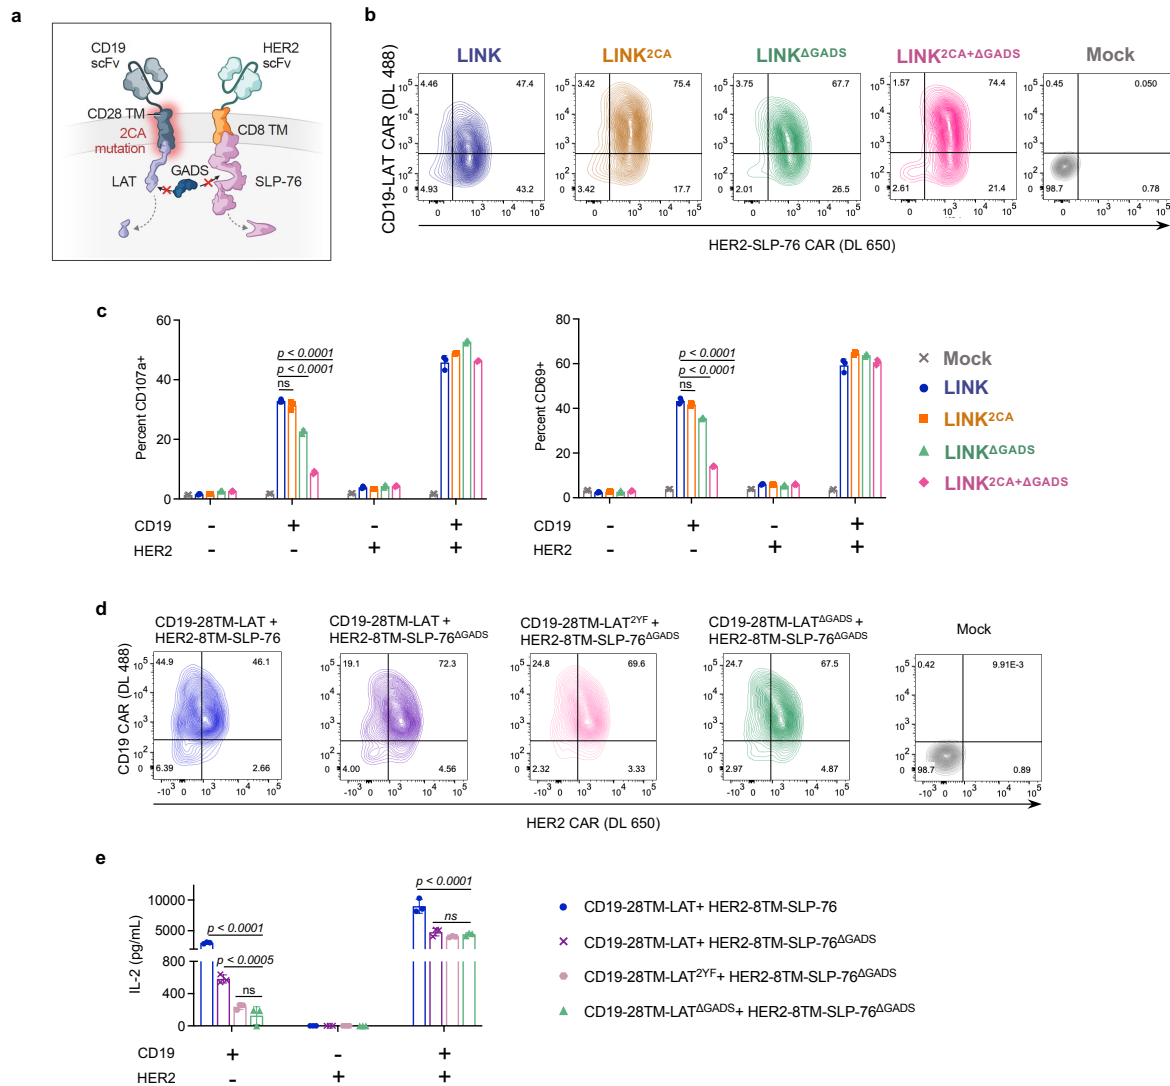

983  
984

### Extended Data Figure 6: Disrupting GADS interactions eliminates LINK CAR leakiness.

986

987 **a**, Schematic illustrating LINK CAR bearing both Cysteine-to-Alanine (2CA) mutations and  
988 GADS binding site deletions ( $\Delta$ GADS).

989 **b**, Flow cytometric expression of LINK CARs ( $\pm$ 2CA,  $\pm$  $\Delta$ GADS) on T cells utilized in assays in  
990 **Figure 4b-d**.

991 **c**, Quantification of CD107a<sup>+</sup> and CD69 on indicated LINK CAR T cells following co-culture with  
992 cell lines shown in **Figure 3c**. Baseline measurements from the CD107a unstimulated controls  
993 were subtracted from the stimulated CD107a conditions. Representative of five independent  
994 experiments with four different T cell donors. Shown are mean values  $\pm$  s.d. of three experimental  
995 replicates. *p* values were obtained by one way ANOVA with multiple comparisons.

996 **d**, Flow cytometric expression of LINK CARs bearing either Y171F/Y191F point mutations (2YF)  
997 or truncation of the GADS binding regions ( $\Delta$ GADS).

998 e, IL-2 secretion (as measured by ELISA) by indicated LINK CAR T cells following co-culture  
999 with cell lines shown in **Figure 3c**. Shown are mean values  $\pm$  s.d. of three experimental replicates.  
1000 Performed one time. Note that data for CD19-28TM-LAT + HER2-8TM-SLP-76 and CD19-  
1001 28TM-LAT <sup>$\Delta$ GADS</sup> + HER2-8TM-SLP-76 <sup>$\Delta$ GADS</sup> conditions are identical to **Figure 4b**. *p* values were  
1002 obtained by one way ANOVA with multiple comparisons.  
1003

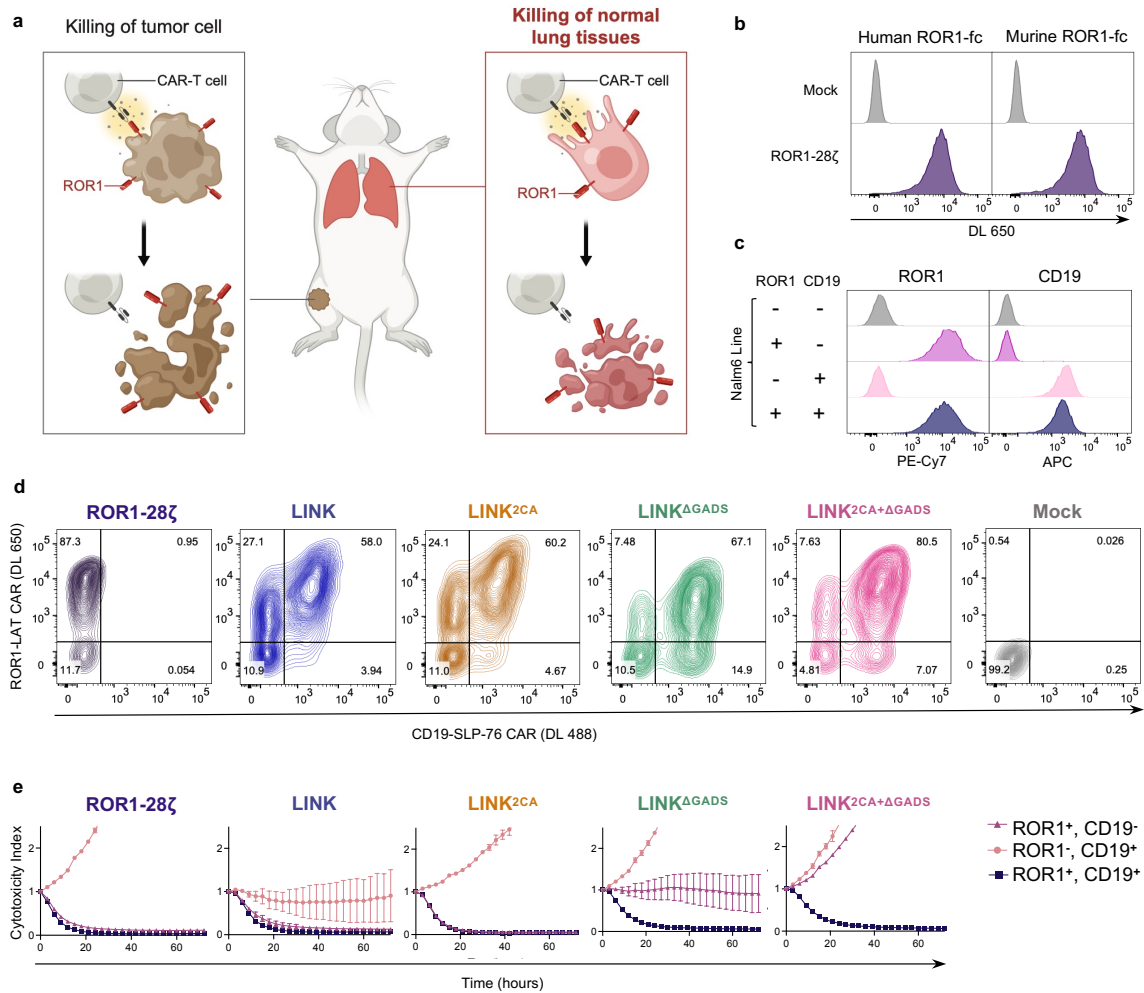

1004  
1005  
1006  
1007  
1008

**Extended Data Figure 7: Design of a ROR1-targeting LINK CAR for testing in a model of on-target, off-tumor toxicity.**

1009 **a**, Schematic illustrating on-target, off-tumor toxicity in the lungs of tumor-bearing mice treated  
1010 with ROR1 targeted CAR T cells.  
1011 **b**, Flow cytometry plots exhibiting detection of ROR1-28ζ CAR on T cells with both recombinant  
1012 human and murine ROR1.  
1013 **c**, ROR1 and CD19 expression on single/double antigen positive Nalm6 lines used for AND-gate  
1014 verification experiments.  
1015 **d**, Flow cytometric expression of ROR1-28ζ or indicated ROR1/CD19-targeted LINK CARs on T  
1016 cells used for *in vitro* and *in vivo* (Figure 4e-g) testing.  
1017 **e**, Tumor cell killing of cell lines shown in **c** co-cultured with the indicated CAR T cells at a 2:1  
1018 ratio of T cells to tumor cells. Shown are mean values ± s.d. of three experimental replicates.  
1019 Representative of four independent experiments performed with two different T cell donors.

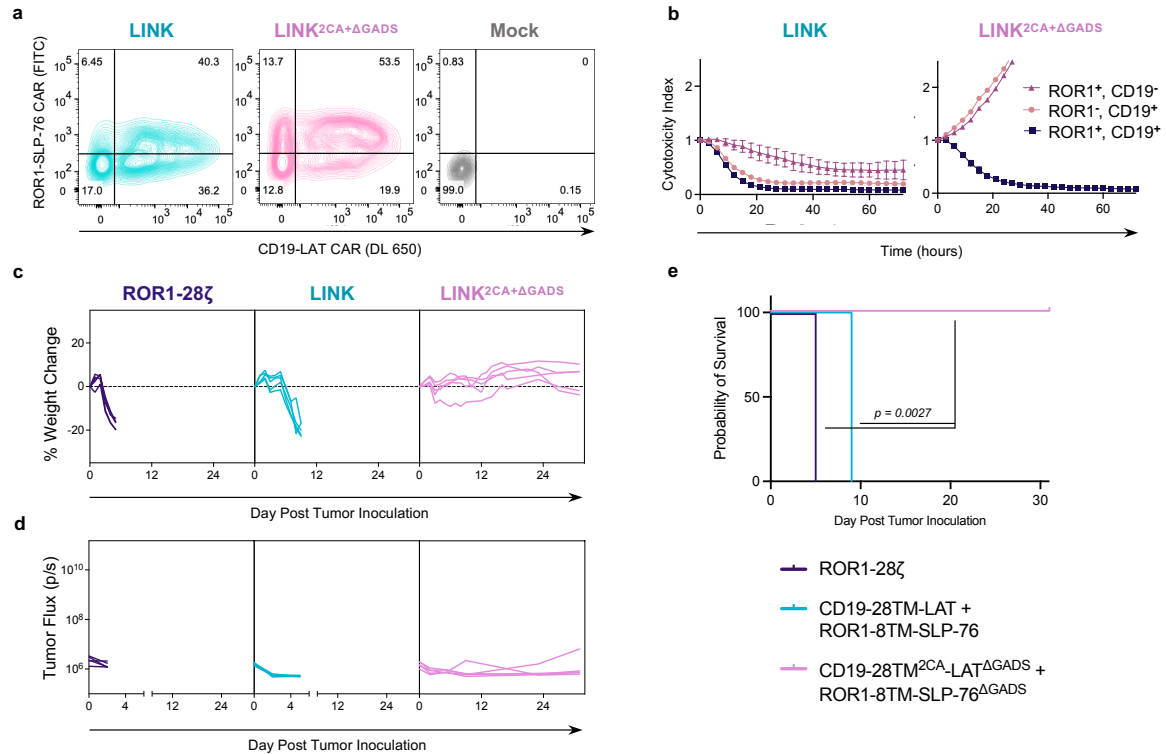

1020  
1021  
1022  
1023

**Extended Data Figure 8: Elimination of single antigen reactivity is essential for both LINK CAR components.**

1024  
1025  
1026  
1027  
1028  
1029  
1030  
1031  
1032

**a**, Flow cytometric expression of ROR1/CD19-targeted LINK CARs on T cells.  
**b**, Tumor cell killing of indicated cell lines by the LINK CAR T cells at a 2:1 ratio of T cells to tumor cells. Shown are mean values  $\pm$  s.d. of three experimental replicates. Performed one time.  
**c-e**, NSG mice bearing ROR1<sup>+</sup>Nalm6-luciferase were treated with the indicated LINK CAR T cells with the SLP-76 CAR bearing specificity for ROR1 (reversed from Figure 4). **(c)** Weights for individual mice over time plotted as a percentage of the weight on day 0. **(d)** Quantification of tumor progression for each individual mouse as measured by flux values acquired via bioluminescence imaging (BLI). **(e)** Survival curves for mice bearing tumors shown in **d**.  $p$  values were determined by the Log-rank test. Performed once with  $n=5$  mice per group.

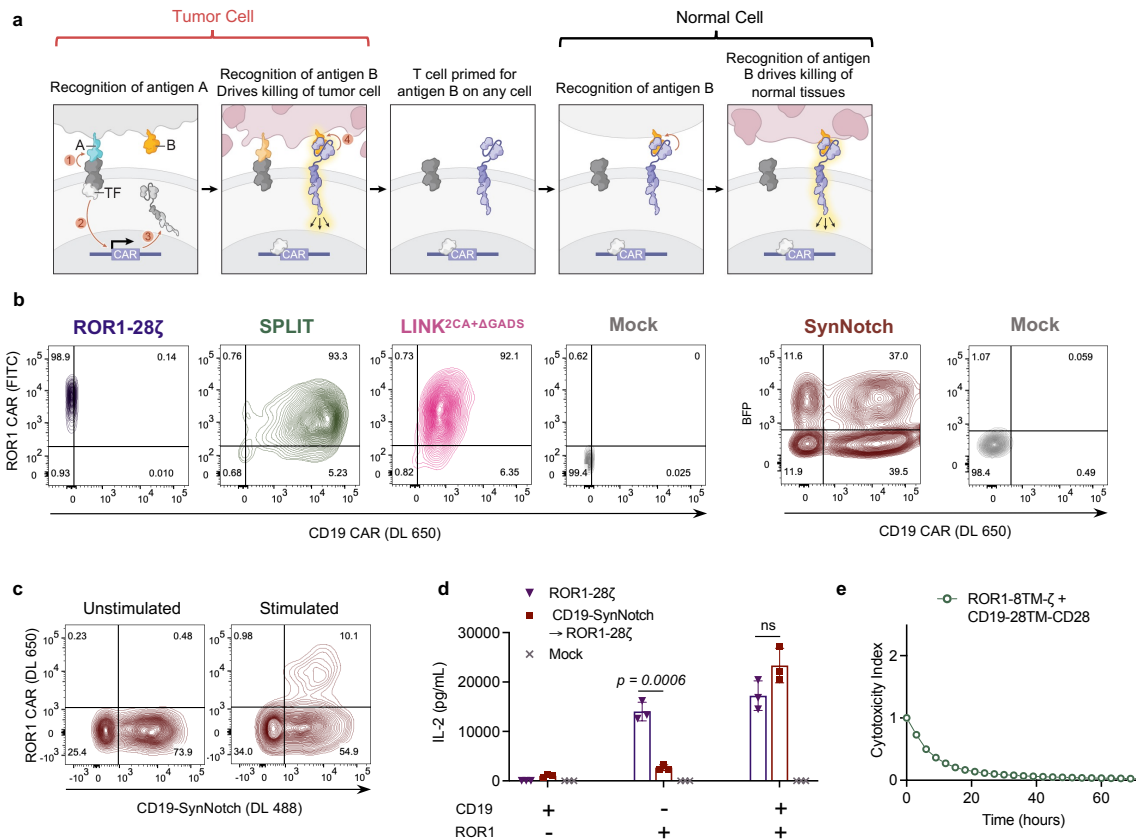

1033  
1034

1035 **Extended Data Figure 9: LINK CAR outperforms both SynNotch and SPLIT CAR systems.**  
1036

1037 **a**, Schematic illustrating the potential for on-target, off-tumor toxicity for SynNotch CAR T cells.  
1038 **b**, Flow cytometric expression of ROR1-28ζ and ROR1/CD19-targeted LINK, SPLIT, and  
1039 SynNotch on T cells day 10 after activation.

1040 **c**, Inducible ROR1-28ζ CAR expression (detected with recombinant ROR1 protein) following  
1041 stimulation of the CD19-SynNotch receptor through 24 hour stimulation with Nalm6.

1042 **d**, IL-2 secretion (as measured by ELISA) by ROR1-28ζ and CD19-SynNotch → ROR1-28ζ CAR  
1043 T cells following co-culture with the indicated cell lines. Shown are mean values ± s.d. of three  
1044 experimental replicates. Conducted with the same T cells used *in vivo* for **Figure 4h-j**. *p* values  
1045 were obtained by unpaired two-tailed t-tests.

1046 **e**, Killing of ROR1<sup>+</sup>Nalm6 (CD19<sup>+</sup>, ROR1<sup>+</sup>) tumor cells by ROR1/CD19-targeting SPLIT CAR T  
1047 cells cocultured at a 2:1 T cell to tumor ratio. Shown are mean values ± s.d. of three experimental  
1048 replicates. Representative of two independent experiments with different T cell donors.  
1049



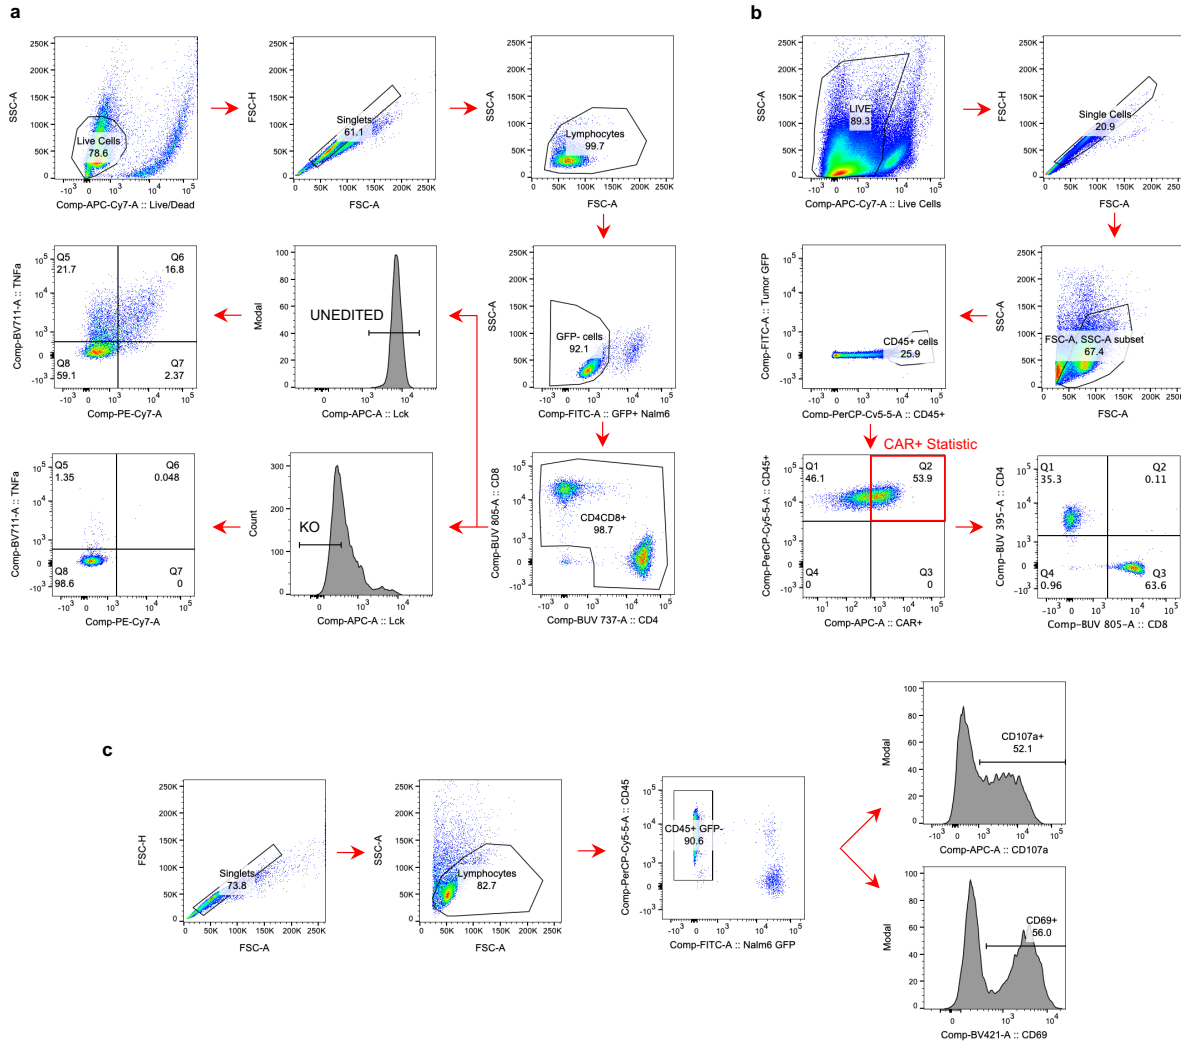

1050

1051 **Extended Data Figure 10: Gating strategies for flow cytometry.**

1052 **a**, Intracellular cytokine staining of CRISPR/Cas9-edited CAR T Cells (Figures 1c-e, 2h-i, 3h-i;  
 1053 Extended Data Figures 1c-e, 3e-h, 5b-e).

1054 **b**, Detection of CAR<sup>+</sup> T cells isolated from murine spleen and bone marrow tissue (Figure 2e;  
 1055 Extended Data Figure 2e).

1056 **c**, LINK CAR T cell activation assays measuring CD107a and CD69 (Figure 4d; Extended Data  
 1057 Figure 6c).
